# Supplementary material
Source: PubMed Central journal article supplement (PMC5338407)
Supplement: pnas.1612254114.sapp.pdf [file pnas.1612254114.sapp.pdf]

# Molecular basis of fatty acid selectivity in the zDHC family of S-acyltransferases revealed by click chemistry

Greaves et al

## SUPPLEMENTARY INFORMATION APPENDIX

### General Experimental Details

Unless otherwise stated, all commercially available reagents were used as supplied without any further purification. <sup>n</sup>BuLi was purchased as a 2.5 M solution, and the solution was titrated with diphenylacetic acid prior to use. Dry THF was used directly from a PureSolv MD 5 Solvent Purification System by Innovative Technology Inc., and handled under inert atmosphere. 1,3-Dimethyl-3,4,5,6-tetrahydro-2(1*H*)-pyrimidinone (DMPU) was dried by heating to reflux over calcium hydride and distilling under vacuum before being purged with, and stored under N<sub>2</sub> over 4 Å molecular sieves. Flash chromatography was carried out using Merck Kieselgel 60 H silica. Analytical thin layer chromatography was carried out using aluminium-backed plates coated with Merck Kieselgel 60 GF<sub>254</sub> that were visualised using *p*-anisaldehyde. Nuclear magnetic resonance (NMR) spectra were recorded on a 400 MHz Ultrashield Magnet, Prodigy liquid nitrogen cryoprobe, AVIII console and a Z420 HP workstation running TopSpin 3.X running at 400 MHz (<sup>1</sup>H NMR) and 101 MHz (<sup>13</sup>C NMR); an 500 MHz Ascend magnet, BBO multi nuc' Smart probe, AVIIIHD500 console and Z420 HP workstation running TopSpin 3.X running at 500 MHz (<sup>1</sup>H NMR) and 126 MHz (<sup>13</sup>C NMR) or a 600 MHz Ultrashield magnet, BBO multi nuc' probe, AVII+ console and a Z420 HP workstation running TopSpin 3.X running at 600 MHz (<sup>1</sup>H NMR) or 151 MHz (<sup>13</sup>C NMR). Chemical shifts are reported in parts per million (ppm) in the scale relative to CDCl<sub>3</sub>, 7.26 ppm for <sup>1</sup>H NMR and 77.16 for <sup>13</sup>C NMR; DMSO-*d*<sub>6</sub>, 2.50 ppm for <sup>1</sup>H NMR and 39.52 for <sup>13</sup>C NMR. Coupling constants are measured in Hertz (Hz). Low-resolution mass spectra (LRMS) were recorded on an Agilent 6130 single quadrupole with APCI/ESI dual source, on a ThermoQuest Finnigan LCQ DUO electrospray, or on an Agilent 7890A GC system, equipped with a 30 m DB5MS column connected to a 5975C inert XL CI MSD with Triple-Axis Detector. MALDI were performed on an Axima-CFR from Kratos-Shimadzu. High-resolution mass spectra (HRMS) were obtained courtesy of the EPSRC National Mass Spectrometry Facility at Swansea University, UK. Infrared spectra were recorded on an Agilent 5500a FTIR equipped with ATR (Attenuated Total Reflectance) and were reported in cm<sup>-1</sup>. *In vacuo* refers to evaporation under reduced pressure using a rotary evaporator connected to a diaphragm pump, followed by the removal of trace volatiles using a high vacuum (oil) pump. Melting points were determined with a Gallenkamp SG92 melting point apparatus and are uncorrected.

## Preparation of fatty acid azide and alkyne chemical probes

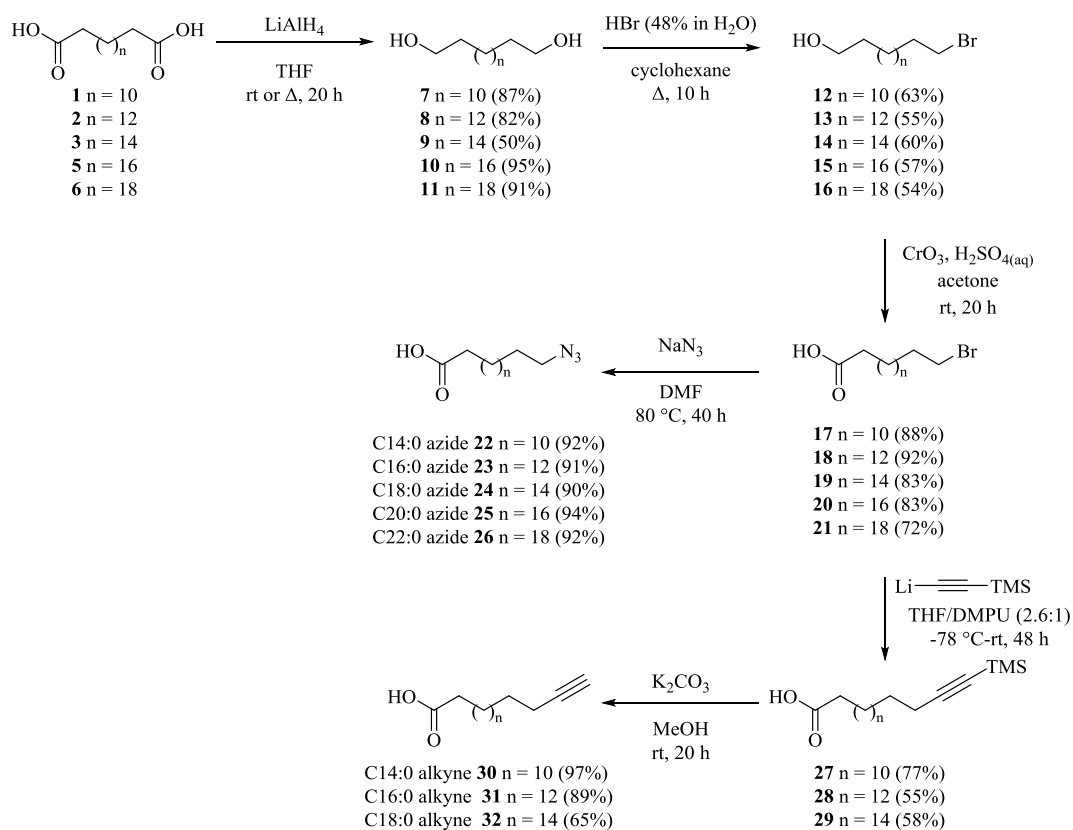

### Preparation of 1,14-tetradecanediol 7(1)

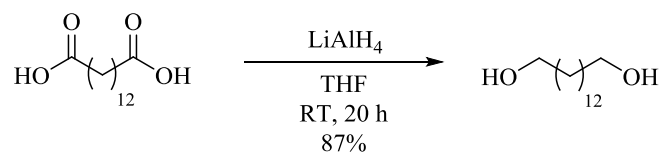

Reaction performed under a N<sub>2</sub> atmosphere.

Solid LiAlH<sub>4</sub> (1.47 g, 38.7 mmol) was added to a solution of 1,14-tetradecanedioic acid (5.00 g, 19.35 mmol) in THF (194 mL) at 0 °C. The reaction was allowed to warm to room temperature and stirred at room temperature for 20 h. Upon completion, wet NaSO<sub>4</sub> was added portion-wise until the grey suspension turned white. The suspension was stirred at room temperature until the white solid was free-flowing, and solid MgSO<sub>4</sub> was added. The reaction was filtered and the filter cake washed with Et<sub>2</sub>O (5 × 50 mL). The solvent was evaporated *in vacuo* to afford the product (3.88 g, 87%) as a white solid.

$\delta_{\text{H}}$  (600 MHz, DMSO-d<sub>6</sub>) 4.29 (t, 2H, *J* 5.0 Hz, 2 × OH), 3.35–3.38 (m, 4H, 2 × CH<sub>2</sub>OH), 1.36–1.42 (m, 4H, 2 × CH<sub>2</sub>CH<sub>2</sub>OH), 1.22–1.29 (m, 20H, 10 × CH<sub>2</sub>).

$\delta_{\text{C}}$  (151 MHz, DMSO-d<sub>6</sub>) 60.7, 32.5, 29.1, 29.0, 29.0, 28.9, 25.5.

LR-MS (MALDI-TOF) 253.2 ([M+Na]<sup>+</sup>)

HR-MS calcd for C<sub>14</sub>H<sub>31</sub>O<sub>2</sub><sup>+</sup> ([M+H]<sup>+</sup>) 231.2318, found 231.2318.

$\nu_{\text{max}}$  (thin film, cm<sup>-1</sup>) 3410, 3351, 2921, 2891, 2850.

Mp 88–90 °C (lit. 87–89 °C)(1)

### Preparation of 14-bromotetradecan-1-ol 12(2, 3)

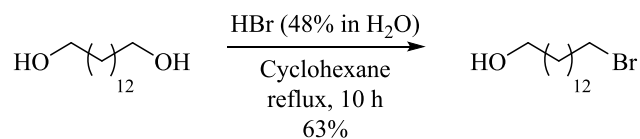

HBr (48% in H<sub>2</sub>O, 41 mL) was added to a suspension of diol **7** (3.57 g, 15.5 mmol) in cyclohexane (41 mL). The biphasic mixture was heated to reflux for 10 h before being cooled to room temperature. The layers were separated and the aqueous phase extracted with CH<sub>2</sub>Cl<sub>2</sub> (4 × 30 mL). The combined organics were washed with NaHCO<sub>3</sub> (4 × 20 mL of a saturated aqueous solution), brine (20 mL), dried over MgSO<sub>4</sub>, filtered and concentrated *in vacuo*. The crude residue was purified by column chromatography, eluting with 95:5 petrol/EtOAc then 70:30 petrol/EtOAc, to afford the product (2.85 g, 63%) as a pale yellow solid.

$\delta_{\text{H}}$  (400 MHz, CDCl<sub>3</sub>) 3.64 (t, 2H, *J* 6.6 Hz, CH<sub>2</sub>OH), 3.40 (t, 2H, *J* 6.9 Hz, CH<sub>2</sub>Br), 1.80–1.90 (m, 2H, CH<sub>2</sub>CH<sub>2</sub>Br), 1.53–1.60 (m, 2H, CH<sub>2</sub>CH<sub>2</sub>OH), 1.25–1.46 (m, 20H, 10 × CH<sub>2</sub>).

$\delta_{\text{C}}$  (101 MHz, CDCl<sub>3</sub>) 63.2, 34.2, 33.0, 33.0, 29.7, 29.7, 29.6, 28.3, 28.9.

LR-MS (EI+) 294.9 ([M(<sup>81</sup>Br)+H]<sup>+</sup>), 292.9 ([M(<sup>79</sup>Br)+H]<sup>+</sup>), 276.9 ([M(<sup>81</sup>Br)-H<sub>2</sub>O+H]<sup>+</sup>), 292.9 ([M(<sup>79</sup>Br)-H<sub>2</sub>O+H]<sup>+</sup>), 213.9 ([M-Br+H]<sup>+</sup>).

HR-MS calcd for C<sub>14</sub>H<sub>33</sub>ON<sup>79</sup>Br<sup>+</sup> ([M+NH<sub>4</sub>]<sup>+</sup>) 310.1740, found 310.1744.

$\nu_{\max}$  (thin film, cm<sup>-1</sup>) 3274, 2919, 2850.

Mp 46–48 °C (lit. 42–43 °C)(3)

#### Preparation of 14-bromotetradecanoic acid **17**(4, 5)

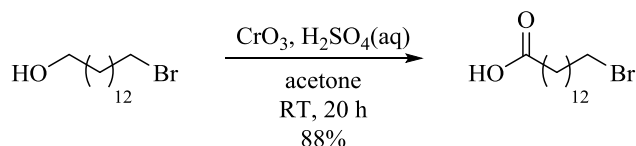

CrO<sub>3</sub> (3.89 g, 38.92 mmol) was dissolved in concentrated H<sub>2</sub>SO<sub>4</sub> (7.2 mL). Cold H<sub>2</sub>O (16.2 mL) was added slowly and the solution stirred at room temperature for 10 min. The resulting solution was added drop-wise to a solution of alcohol **12** (2.85 g, 9.73 mmol) in acetone (243 mL). The reaction was stirred at room temperature for 20 h before being H<sub>2</sub>O (100 mL) and CH<sub>2</sub>Cl<sub>2</sub> (40 mL) were added. The layers were separated and the aqueous phase extracted with CH<sub>2</sub>Cl<sub>2</sub> (4 × 30 mL). The combined organics were washed with brine (30 mL), dried over MgSO<sub>4</sub>, filtered and concentrated *in vacuo*. The crude residue was purified by column chromatography, eluting with 90:10 petrol/EtOAc (+0.1% AcOH), to afford the product (2.63 g, 88%) as a white solid.

$\delta_{\text{H}}$  (400 MHz, CDCl<sub>3</sub>) 3.41 (t, 2H, *J* 6.9 Hz, CH<sub>2</sub>Br), 2.35 (t, 2H, *J* 7.5 Hz, CH<sub>2</sub>CO<sub>2</sub>H), 1.81–1.89 (m, 2H, CH<sub>2</sub>CH<sub>2</sub>Br), 1.59–1.68 (m, 2H, CH<sub>2</sub>CH<sub>2</sub>CO<sub>2</sub>H), 1.24–1.45 (m, 18H, 9 × CH<sub>2</sub>).

$\delta_{\text{C}}$  (101 MHz, CDCl<sub>3</sub>) 179.0, 34.2, 34.0, 33.0, 29.7, 29.7, 29.6, 29.4, 29.2, 28.9, 28.3, 24.8.

LR-MS (EI+) 309.0 ([M(<sup>81</sup>Br)+H]<sup>+</sup>), 307.0 ([M(<sup>79</sup>Br)+H]<sup>+</sup>), 291.0 ([M(<sup>81</sup>Br)-H<sub>2</sub>O+H]<sup>+</sup>), 289.0 ([M(<sup>79</sup>Br)-H<sub>2</sub>O+H]<sup>+</sup>), 227.1 ([M-Br+H]<sup>+</sup>).

HR-MS calcd for C<sub>14</sub>H<sub>26</sub>O<sup>79</sup>Br<sup>-</sup> ([M-H]<sup>-</sup>) 305.1122, found 305.1123.

$\nu_{\max}$  (thin film, cm<sup>-1</sup>) 3036, 2917, 2852, 1696

Mp 63–66 °C (lit. 64–65 °C)(5)

#### Preparation of 14-azidotetradecanoic acid **22**(4, 6)

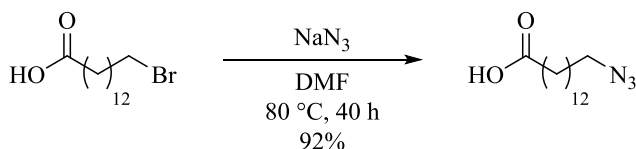

Reaction performed under a N<sub>2</sub> atmosphere

NaN<sub>3</sub> (636 mg, 9.78 mmol) was added to a solution of bromide **17** (500 mg, 1.63 mmol) in DMF (6.5 mL). The reaction was stirred at 80 °C for 40 h before being cooled to room temperature. A 1:1 mixture of EtOAc/H<sub>2</sub>O (20 mL) was added, the layers separated and the aqueous phase extracted with EtOAc (3 × 10 mL). The combined organics were washed with brine (10 mL), dried

over  $\text{MgSO}_4$ , filtered and concentrated *in vacuo*. The crude residue was purified by column chromatography, eluting with 90:10 petrol/EtOAc (+0.1% AcOH), to afford the product (403 mg, 92%) as a white solid.

$\delta_{\text{H}}$  (400 MHz,  $\text{CDCl}_3$ ) 3.25 (t, 2H,  $J$  7.0 Hz,  $\text{CH}_2\text{N}_3$ ), 2.34 (t, 2H,  $J$  7.5 Hz,  $\text{CH}_2\text{CO}_2\text{H}$ ), 1.55–1.68 (m, 4H,  $\text{CH}_2\text{CH}_2\text{N}_3$ ,  $\text{CH}_2\text{CH}_2\text{CO}_2\text{H}$ ), 1.23–1.38 (m, 18H,  $9 \times \text{CH}_2$ ).

$\delta_{\text{C}}$  (101 MHz,  $\text{CDCl}_3$ ) 180.1, 51.6, 34.2, 29.7, 29.6, 29.6, 29.5, 29.4, 29.3, 29.2, 29.0, 26.9, 24.8.

LR-MS (ES-) 268.1 ( $[\text{M}-\text{H}]^-$ ), 240.1 ( $[\text{M}-\text{N}_2-\text{H}]^-$ ).

HR-MS calcd for  $\text{C}_{14}\text{H}_{26}\text{N}_3\text{O}_2^-$  ( $[\text{M}-\text{H}]^-$ ) 268.2031, found 268.2028.

$\nu_{\text{max}}$  (thin film,  $\text{cm}^{-1}$ ) 3016, 2915, 2848, 2101, 1701.

Mp 38–40 °C.

### Preparation of 16-(trimethylsilyl)hexadec-15-ynoic acid **27**

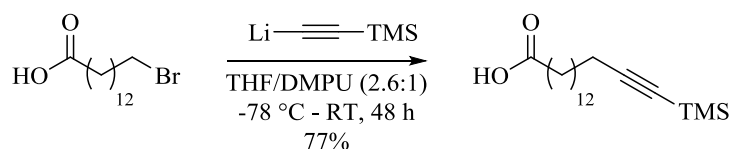

Reaction performed under a  $\text{N}_2$  atmosphere.

$^n\text{BuLi}$  (2.19 M, 7.46 mL, 16.3 mmol) was added drop-wise to a solution of (trimethylsilyl)acetylene (1.6 g, 2.3 mL, 16.3 mmol) in THF (10 mL) at  $-78$  °C. The reaction was stirred at  $-78$  °C for 1 h before DMPU (18 mL) was added and the reaction stirred for a further 30 min. A solution of bromide **17** (500 mg, 1.63 mmol) in THF (37 mL) was added drop-wise and the reaction stirred at room temperature for 48 h. Upon completion, the reaction was quenched with HCl (20 mL of a 1 M solution). The layers were separated and the aqueous phase extracted with  $\text{Et}_2\text{O}$  ( $4 \times 20$  mL). The combined organics were washed with brine ( $3 \times 20$  mL), dried over  $\text{MgSO}_4$ , filtered and concentrated *in vacuo*. The crude residue was purified by column chromatography, eluting with 90:10 petrol/EtOAc (+0.1% AcOH), to afford the product (407 mg, 77%) as a white solid.

$\delta_{\text{H}}$  (400 MHz,  $\text{CDCl}_3$ ) 2.34 (t, 2H,  $J$  7.5 Hz,  $\text{CH}_2\text{CO}_2\text{H}$ ), 2.20 (t, 2H,  $J$  7.2 Hz,  $\text{CH}_2\text{C}\equiv\text{CSi}$ ), 1.58–1.67 (m, 2H,  $\text{CH}_2\text{CH}_2\text{CO}_2\text{H}$ ), 1.46–1.55 (m, 2H,  $\text{CH}_2\text{CH}_2\text{C}\equiv\text{CSi}$ ), 1.25–1.39 (m, 18H,  $9 \times \text{CH}_2$ ), 0.14 (s, 9H,  $\text{Si}(\text{CH}_3)_3$ ).

$\delta_{\text{C}}$  (101 MHz,  $\text{CDCl}_3$ ) 180.3, 107.9, 84.4, 34.2, 29.7, 29.6, 29.6, 29.4, 29.2, 28.9, 28.8, 24.8, 20.0, 0.3.

LR-MS (ES-) 323.2 ( $[\text{M}-\text{H}]^-$ ).

HR-MS calcd for  $\text{C}_{19}\text{H}_{35}\text{O}_2\text{Si}^-$  ( $[\text{M}-\text{H}]^-$ ) 323.2412, found 323.2408.

$\nu_{\text{max}}$  (thin film,  $\text{cm}^{-1}$ ) 2939, 2921, 2852, 2178, 1714, 1699.

Mp 37–40 °C

### Preparation of hexadec-15-ynoic acid **30**(**7**, **8**)

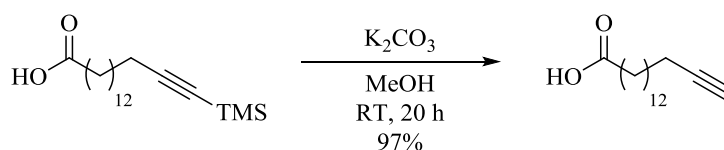

$\text{K}_2\text{CO}_3$  (285 mg, 2.06 mmol) was added to a solution of TMS-alkyne **27** (268 mg, 0.82 mmol) in methanol (8.2 mL) at room temperature. The reaction was stirred at room temperature for 20 h before the solvent was evaporated *in vacuo*. The residue was dissolved in EtOAc (15 mL) and HCl (15 mL of a 1 M aqueous solution) added. The layers were separated and the aqueous phase extracted with EtOAc (3  $\times$  20 mL). The combined organics were washed with brine (20 mL), dried over  $\text{MgSO}_4$ , filtered and concentrated *in vacuo*. The crude residue was purified by column chromatography, eluting with 90:10 petrol/EtOAc (+0.1% AcOH), to afford the product (200 mg, 97%) as a white solid.

$\delta_{\text{H}}$  (400 MHz,  $\text{CDCl}_3$ ) 2.34 (t, 2H,  $J$  7.5 Hz,  $\text{CH}_2\text{CO}_2\text{H}$ ), 2.18 (td, 2H,  $J$  7.1 Hz,  $^4J$  2.7 Hz,  $\text{CH}_2\text{C}\equiv\text{CH}$ ), 1.93 (t, 1H,  $^4J$  2.7 Hz,  $\text{C}\equiv\text{CH}$ ), 1.58–1.67 (m, 2H,  $\text{CH}_2\text{CH}_2\text{CO}_2\text{H}$ ), 1.47–1.55 (m, 2H,  $\text{CH}_2\text{CH}_2\text{C}\equiv\text{CH}$ ), 1.25–1.43 (m, 18H, 9  $\times$   $\text{CH}_2$ ).

$\delta_{\text{C}}$  (101 MHz,  $\text{CDCl}_3$ ) 180.3, 85.0, 68.2, 34.2, 29.7, 29.6, 29.6, 29.4, 29.2, 29.2, 28.9, 28.6, 24.8, 18.5.

LR-MS (ES<sup>-</sup>) 251.2 ( $[\text{M}-\text{H}]^-$ ).

HR-MS calcd for  $\text{C}_{16}\text{H}_{27}\text{O}_2^-$  ( $[\text{M}-\text{H}]^-$ ) 251.2017, found 251.2017.

$\nu_{\text{max}}$  (thin film,  $\text{cm}^{-1}$ ) 3285, 3042, 2917, 2852, 2115, 1694.

Mp 59–61 °C.

### Preparation of 1,16-hexadecanediol **8**(**9**)

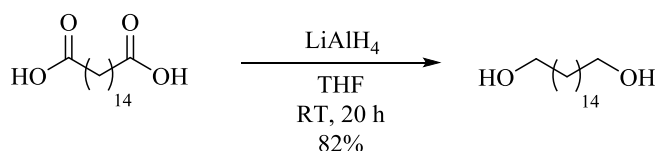

Reaction performed under a  $\text{N}_2$  atmosphere.

Solid  $\text{LiAlH}_4$  (1.33 g, 34.9 mmol) was added to a solution of 1,16-hexadecanedioic acid (5.00 g, 17.46 mmol) in THF (175 mL) at 0 °C. The reaction was allowed to warm to room temperature and stirred at room temperature for 20 h. Upon completion, wet  $\text{NaSO}_4$  was added portion-wise until the grey suspension turned white. The suspension was stirred at room temperature until the white solid was free-flowing, and solid  $\text{MgSO}_4$  was added. The reaction was filtered and the filter cake washed with  $\text{Et}_2\text{O}$  (5  $\times$  50 mL). The solvent was evaporated *in vacuo* to afford the product (3.68 g, 82%) as a white solid.

$\delta_{\text{H}}$  (600 MHz,  $\text{DMSO}-d_6$ ) 4.29 (t, 2H,  $J$  4.9 Hz, 2  $\times$  OH), 3.34–3.39 (m, 4H, 2  $\times$   $\text{CH}_2\text{OH}$ ), 1.36–1.42 (m, 4H, 2  $\times$   $\text{CH}_2\text{CH}_2\text{OH}$ ), 1.22–1.29 (m, 24H, 12  $\times$   $\text{CH}_2$ ).

$\delta_{\text{C}}$  (151 MHz,  $\text{DMSO}-d_6$ ) 60.7, 32.5, 29.1, 29.0, 29.0, 29.0, 28.9, 25.5.

LR-MS (MALDI-TOF) 281.3 ([M+Na]<sup>+</sup>), 297.3 ([M+K]<sup>+</sup>).

HR-MS calcd for C<sub>16</sub>H<sub>35</sub>O<sub>2</sub><sup>+</sup> ([M+H]<sup>+</sup>) 259.2632, found 259.2632.

$\nu_{\max}$  (thin film, cm<sup>-1</sup>) 3414, 3353, 2919, 2891, 2848.

Mp 91-94 °C (lit. 93-94 °C)(9)

### Preparation of 16-bromohexadecan-1-ol **13**(**10**, **11**)

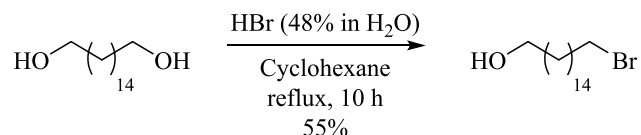

HBr (48% in H<sub>2</sub>O, 36 mL) was added to a suspension of diol **8** (3.48 g, 13.5 mmol) in cyclohexane (36 mL). The biphasic mixture was heated to reflux for 10 h before being cooled to room temperature. The layers were separated and the aqueous phase extracted with CH<sub>2</sub>Cl<sub>2</sub> (4 × 30 mL). The combined organics were washed with NaHCO<sub>3</sub> (4 × 20 mL of a saturated aqueous solution), brine (20 mL), dried over MgSO<sub>4</sub>, filtered and concentrated *in vacuo*. The crude residue was purified by column chromatography, eluting with 95:5 petrol/EtOAc then 70:30 petrol/EtOAc, to afford the product (2.40 g, 55%) as a pale yellow solid.

$\delta_{\text{H}}$  (400 MHz, CDCl<sub>3</sub>) 3.64 (t, 2H, *J* 6.6 Hz, CH<sub>2</sub>OH), 3.41 (t, 2H, *J* 6.9 Hz, CH<sub>2</sub>Br), 1.80–1.91 (m, 2H, CH<sub>2</sub>CH<sub>2</sub>Br), 1.52–1.62 (m, 2H, CH<sub>2</sub>CH<sub>2</sub>OH), 1.25–1.46 (m, 24H, 12 × CH<sub>2</sub>).

$\delta_{\text{C}}$  (101 MHz, CDCl<sub>3</sub>) 63.3, 34.2, 33.0, 33.0, 29.8, 29.8, 29.7, 29.6, 28.9, 28.3, 25.9.

LR-MS (EI<sup>+</sup>) 320.9 ([M(<sup>81</sup>Br)+H]<sup>+</sup>), 318.9 ([M(<sup>79</sup>Br)+H]<sup>+</sup>), 304.9 ([M(<sup>81</sup>Br)-H<sub>2</sub>O+H]<sup>+</sup>), 302.9 ([M(<sup>79</sup>Br)-H<sub>2</sub>O+H]<sup>+</sup>), 241.8 ([M-Br+H]<sup>+</sup>).

HR-MS calcd for C<sub>16</sub>H<sub>37</sub><sup>79</sup>BrON<sup>+</sup> ([M+NH<sub>4</sub>]<sup>+</sup>) 338.2053, found 338.2056.

$\nu_{\max}$  (thin film, cm<sup>-1</sup>) 3274, 2917, 2850.

Mp 54-56 °C (lit. 54-56 °C)(12)

### Preparation of 16-bromohexadecanoic acid **18**(**13**)

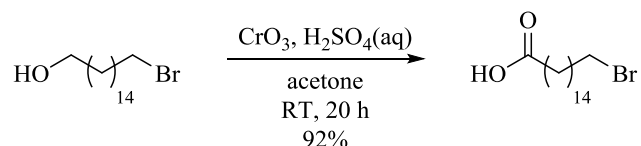

CrO<sub>3</sub> (3.00 g, 30.0 mmol) was dissolved in concentrated H<sub>2</sub>SO<sub>4</sub> (5.5 mL). Cold H<sub>2</sub>O (12.5 mL) was added slowly and the solution stirred at room temperature for 10 min. The resulting solution was added drop-wise to a solution of alcohol **13** (2.40 g, 7.50 mmol) in acetone (188 mL). The reaction was stirred at room temperature for 20 h before being H<sub>2</sub>O (100 mL) and CH<sub>2</sub>Cl<sub>2</sub> (40 mL) were added. The layers were separated and the aqueous phase extracted with CH<sub>2</sub>Cl<sub>2</sub> (4 × 30 mL). The combined organics were washed with brine (30 mL), dried over MgSO<sub>4</sub>, filtered and

concentrated *in vacuo*. The crude residue was purified by column chromatography, eluting with 90:10 petrol/EtOAc (+0.1% AcOH), to afford the product (2.30 g, 92%) as a white solid.

$\delta_{\text{H}}$  (400 MHz,  $\text{CDCl}_3$ ) 3.41 (t, 2H,  $J$  6.9 Hz,  $\text{CH}_2\text{Br}$ ), 2.35 (t, 2H,  $J$  7.5 Hz,  $\text{CH}_2\text{CO}_2\text{H}$ ), 1.80–1.90 (m, 2H,  $\text{CH}_2\text{CH}_2\text{Br}$ ), 1.59–1.68 (m, 2H,  $\text{CH}_2\text{CH}_2\text{CO}_2\text{H}$ ), 1.25–1.48 (m, 22H,  $11 \times \text{CH}_2$ ).

$\delta_{\text{C}}$  (101 MHz,  $\text{CDCl}_3$ ) 178.6, 34.2, 33.9, 33.0, 29.8, 29.7, 29.6, 29.4, 29.2, 28.9, 28.3, 24.8.

LR-MS (EI+) 337.0 ( $[\text{M}^{(81}\text{Br})+\text{H}]^+$ ), 335.0 ( $[\text{M}^{(79}\text{Br})+\text{H}]^+$ ), 317.0 ( $[\text{M}^{(81}\text{Br})-\text{H}_2\text{O}+\text{H}]^+$ ), 315.0 ( $[\text{M}^{(79}\text{Br})-\text{H}_2\text{O}+\text{H}]^+$ ), 257.1 ( $[\text{M}-\text{Br}+\text{H}]^+$ ), 237.1 ( $[\text{M}-\text{Br}-\text{H}_2\text{O}+\text{H}]^+$ ).

HR-MS calcd for  $\text{C}_{16}\text{H}_{30}^{79}\text{BrO}^-$  ( $[\text{M}-\text{H}]^-$ ) 333.1435, found 333.1430.

$\nu_{\text{max}}$  (thin film,  $\text{cm}^{-1}$ ) 3034, 2917, 2850, 1696

Mp 72–74 °C (lit. 71 °C)(11)

### Preparation of 16-azidohexadecanoic acid **23(6)**

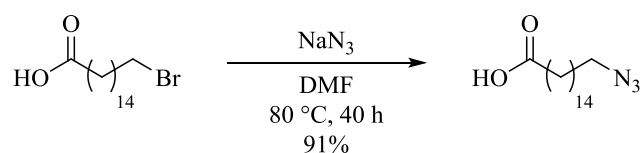

Reaction performed under a  $\text{N}_2$  atmosphere

$\text{NaN}_3$  (582 mg, 8.96 mmol) was added to a solution of bromide **18** (500 mg, 1.49 mmol) in DMF (6 mL). The reaction was stirred at 80 °C for 40 h before being cooled to room temperature. A 1:1 mixture of EtOAc/ $\text{H}_2\text{O}$  (20 mL) was added, the layers separated and the aqueous phase extracted with EtOAc ( $3 \times 10$  mL). The combined organics were washed with brine (10 mL), dried over  $\text{MgSO}_4$ , filtered and concentrated *in vacuo*. The crude residue was purified by column chromatography, eluting with 90:10 petrol/EtOAc (+0.1% AcOH), to afford the product (402 mg, 91%) as a white solid.

$\delta_{\text{H}}$  (400 MHz,  $\text{CDCl}_3$ ) 3.25 (t, 2H,  $J$  7.0 Hz,  $\text{CH}_2\text{N}_3$ ), 2.34 (t, 2H,  $J$  7.5 Hz,  $\text{CH}_2\text{CO}_2\text{H}$ ), 1.55–1.67 (m, 4H,  $\text{CH}_2\text{CH}_2\text{N}_3$ ,  $\text{CH}_2\text{CH}_2\text{CO}_2\text{H}$ ), 1.24–1.40 (m, 22H,  $11 \times \text{CH}_2$ ).

$\delta_{\text{C}}$  (101 MHz,  $\text{CDCl}_3$ ) 180.0, 51.7, 34.2, 29.8, 29.7, 29.7, 29.6, 29.6, 29.4, 29.3, 29.3, 29.2, 29.2, 29.0, 26.9, 24.8.

LR-MS (ES-) 268.2 ( $[\text{M}-\text{N}_2-\text{H}]^-$ ), 296.2 ( $[\text{M}-\text{H}]^-$ ).

HR-MS calcd for  $\text{C}_{16}\text{H}_{32}\text{NO}_2^+$  ( $[\text{M}-\text{N}_2+\text{H}]^+$ ) 270.2440, found 270.2433.

$\nu_{\text{max}}$  (thin film,  $\text{cm}^{-1}$ ) 3014, 2915, 2848, 2103, 1701.

Mp 48–50 °C



### Preparation of 18-(trimethylsilyl)octadec-17-ynoic acid **28**

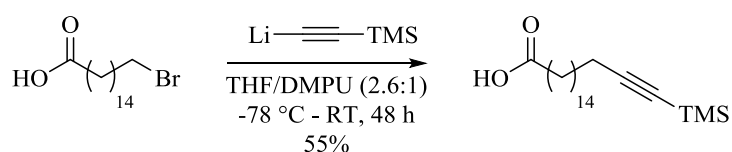

Reaction performed under a N<sub>2</sub> atmosphere.

<sup>n</sup>BuLi (2.09 M, 3.6 mL, 7.46 mmol) was added drop-wise to a solution of (trimethylsilyl)acetylene (773 mg, 1.05 mL, 7.46 mmol) in THF (4.6 mL) at -78 °C. The reaction was stirred at -78 °C for 1 h before DMPU (8.3 mL) was added and the reaction stirred for a further 30 min. A solution of bromide **18** (500 mg, 1.49 mmol) in THF (16.7 mL) was added drop-wise and the reaction stirred at room temperature for 48 h. Upon completion, the reaction was quenched with HCl (20 mL of a 1 M solution). The layers were separated and the aqueous phase extracted with Et<sub>2</sub>O (4 × 20 mL). The combined organics were washed with brine (3 × 20 mL), dried over MgSO<sub>4</sub>, filtered and concentrated *in vacuo*. The crude residue was purified by column chromatography, eluting with 90:10 petrol/EtOAc (+0.1% AcOH), to afford the product (288 mg, 55%) as a white solid.

$\delta_{\text{H}}$  (400 MHz, CDCl<sub>3</sub>) 2.34 (t, 2H, *J* 7.5 Hz, CH<sub>2</sub>CO<sub>2</sub>H), 2.20 (t, 2H, *J* 7.2 Hz, CH<sub>2</sub>C≡CSi), 1.58–1.69 (m, 2H, CH<sub>2</sub>CH<sub>2</sub>CO<sub>2</sub>H), 1.46–1.56 (m, 2H, CH<sub>2</sub>CH<sub>2</sub>C≡CSi), 1.24–1.40 (m, 22H, 11 × CH<sub>2</sub>), 0.14 (s, 9H, Si(CH<sub>3</sub>)<sub>3</sub>).

$\delta_{\text{C}}$  (101 MHz, CDCl<sub>3</sub>) 179.8, 108.0, 84.4, 34.1, 29.8, 29.7, 29.6, 29.6, 29.4, 29.2, 29.0, 28.8, 24.8, 20.0, 0.3.

LR-MS (ES<sup>-</sup>) 351.3 ([M-H]<sup>-</sup>).

HR-MS calcd for C<sub>21</sub>H<sub>39</sub>O<sub>2</sub>Si<sup>-</sup> ([M-H]<sup>-</sup>) 251.2725, found 351.2718.

$\nu_{\text{max}}$  (thin film, cm<sup>-1</sup>) 2937, 2919, 2850, 2178, 1714, 1699.

Mp 50–53 °C

### Preparation of octadec-17-ynoic acid **31(14)**

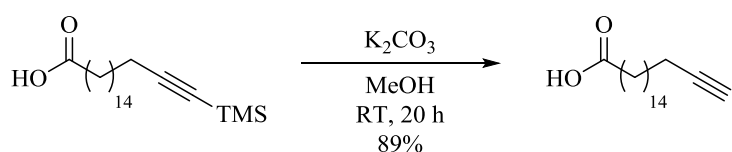

K<sub>2</sub>CO<sub>3</sub> (223 mg, 1.61 mmol) was added to a solution of TMS-alkyne **28** (228 mg, 0.65 mmol) in methanol (6.5 mL) at room temperature. The reaction was stirred at room temperature for 20 h before the solvent was evaporated *in vacuo*. The residue was dissolved in EtOAc (15 mL) and HCl (15 mL of a 1 M aqueous solution) added. The layers were separated and the aqueous phase extracted with EtOAc (3 × 20 mL). The combined organics were washed with brine (20 mL), dried over MgSO<sub>4</sub>, filtered and concentrated *in vacuo*. The crude residue was purified by column chromatography, eluting with 90:10 petrol/EtOAc (+0.1% AcOH), to afford the product (161 mg, 89%) as a white solid.

$\delta_{\text{H}}$  (400 MHz,  $\text{CDCl}_3$ ) 2.34 (t, 2H,  $J$  7.5 Hz,  $\text{CH}_2\text{CO}_2\text{H}$ ), 2.18 (td, 2H,  $J$  7.1 Hz,  $^4J$  2.6 Hz,  $\text{CH}_2\text{C}\equiv\text{CH}$ ), 1.93 (t, 1H,  $^4J$  2.6 Hz,  $\text{C}\equiv\text{CH}$ ), 1.59–1.67 (m, 2H,  $\text{CH}_2\text{CH}_2\text{CO}_2\text{H}$ ), 1.48–1.56 (m, 2H,  $\text{CH}_2\text{CH}_2\text{C}\equiv\text{CH}$ ), 1.24–1.44 (m, 22H,  $11 \times \text{CH}_2$ ).

$\delta_{\text{C}}$  (101 MHz,  $\text{CDCl}_3$ ) 180.1, 85.0, 68.2, 34.2, 29.8, 29.7, 29.6, 29.6, 29.4, 29.3, 29.2, 28.9, 28.7, 28.4, 18.5.

LR-MS (ES<sup>-</sup>) 279.2 ( $[\text{M}-\text{H}]^-$ ).

HR-MS calcd for  $\text{C}_{18}\text{H}_{31}\text{O}_2^-$  ( $[\text{M}-\text{H}]^-$ ) 279.2330, found 279.2331.

$\nu_{\text{max}}$  (thin film,  $\text{cm}^{-1}$ ) 3284, 3042, 2917, 2850, 2115, 1694.

Mp 70–72 °C

### Preparation of 1,18-octadecanediol 9(15-17)

#### Method A

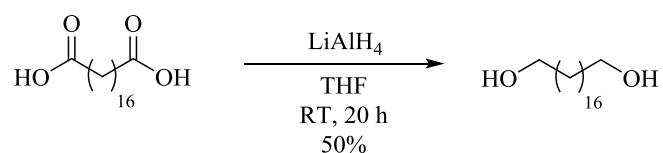

Reaction performed under a  $\text{N}_2$  atmosphere.

Solid  $\text{LiAlH}_4$  (1.21 g, 31.8 mmol) was added to a solution of 1,18-octadecanedioic acid (5.00 g, 15.9 mmol) in THF (160 mL) at 0 °C. The reaction was allowed to warm to room temperature and stirred at room temperature for 20 h. Upon completion, wet  $\text{NaSO}_4$  was added portion-wise until the grey suspension turned white. The suspension was stirred at room temperature until the white solid was free-flowing, and solid  $\text{MgSO}_4$  was added. The reaction was filtered and the filter cake washed with  $\text{Et}_2\text{O}$  ( $5 \times 50$  mL). The solvent was evaporated *in vacuo* to afford the product (2.26 g, 50%) as a white solid.

#### Method B

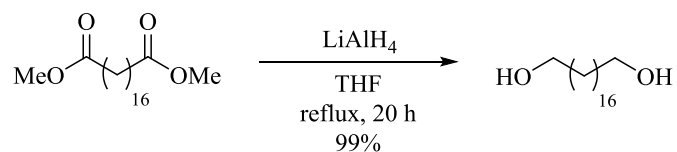

Reaction performed under a  $\text{N}_2$  atmosphere.

Solid  $\text{LiAlH}_4$  (1.44 g, 37.96 mmol) was added to a vigorously stirred solution of dimethyl octadecanedioate (5.00 g, 14.9 mmol) at room temperature. The reaction was heated to reflux and stirred at reflux for 20 h. Upon completion, the reaction was cooled to room temperature and wet  $\text{NaSO}_4$  was added portion-wise until the grey suspension turned white. The suspension was stirred at room temperature until the white solid was free-flowing, and solid  $\text{MgSO}_4$  was added. The reaction was filtered and the filter cake washed with  $\text{Et}_2\text{O}$  ( $5 \times 50$  mL). The solvent was evaporated *in vacuo* to afford the product (4.15 g, 99%) as a white solid.

$\delta_{\text{H}}$  (600 MHz, DMSO- $d_6$ ) 4.30 (t, 2H,  $J$  5.1 Hz,  $2 \times \text{OH}$ ), 3.34–3.39 (m, 4H,  $2 \times \text{CH}_2\text{OH}$ ), 1.35–1.43 (m, 4H,  $2 \times \text{CH}_2\text{CH}_2\text{OH}$ ), 1.23 (app. br. s., 28H,  $14 \times \text{CH}_2$ ).

$\delta_{\text{C}}$  (151 MHz, DMSO- $d_6$ ) 60.6, 32.3, 28.8, 28.8, 28.7, 25.3.

LR-MS (MALDI-TOF) 293.3 ( $[\text{M}+\text{Li}]^+$ ), 309.3 ( $[\text{M}+\text{Na}]^+$ ).

HR-MS calcd for  $\text{C}_{18}\text{H}_{39}\text{O}_2^+$  ( $[\text{M}+\text{H}]^+$ ) 287.2945, found 287.2946.

$\nu_{\text{max}}$  (thin film,  $\text{cm}^{-1}$ ) 3416, 3353, 2919, 2891.

Mp 103–106 °C (lit. 98–99 °C)(16, 17)

### Preparation of 18-bromooctadecan-1-ol **14**(**12**)

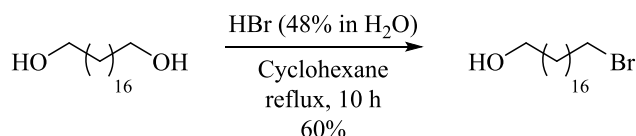

HBr (48% in  $\text{H}_2\text{O}$ , 21 mL) was added to a suspension of diol **9** (2.26 g, 7.9 mmol) in cyclohexane (21 mL). The biphasic mixture was heated to reflux for 10 h before being cooled to room temperature. The layers were separated and the aqueous phase extracted with  $\text{CH}_2\text{Cl}_2$  ( $4 \times 20$  mL). The combined organics were washed with  $\text{NaHCO}_3$  ( $4 \times 20$  mL of a saturated aqueous solution), brine (20 mL), dried over  $\text{MgSO}_4$ , filtered and concentrated *in vacuo*. The crude residue was purified by column chromatography, eluting with 95:5 petrol/EtOAc then 70:30 petrol/EtOAc, to afford the product (1.65 g, 60%) as a pale yellow solid.

$\delta_{\text{H}}$  (400 MHz,  $\text{CDCl}_3$ ) 3.64 (t, 2H,  $J$  6.6 Hz,  $\text{CH}_2\text{OH}$ ), 3.40 (t, 2H,  $J$  6.9 Hz,  $\text{CH}_2\text{Br}$ ), 1.81–1.89 (m, 2H,  $\text{CH}_2\text{CH}_2\text{Br}$ ), 1.53–1.60 (m, 2H,  $\text{CH}_2\text{CH}_2\text{OH}$ ), 1.25–1.46 (m, 28H,  $14 \times \text{CH}_2$ ).

$\delta_{\text{C}}$  (101 MHz,  $\text{CDCl}_3$ ) 63.3, 34.2, 33.0, 33.0, 29.8, 29.8, 29.7, 29.6, 28.9, 28.3, 25.9.

LR-MS (ES+) 332.5 ( $[\text{M}^{(81}\text{Br})-\text{H}_2\text{O}+\text{H}]^+$ ), 330.5 ( $[\text{M}^{(79}\text{Br})-\text{H}_2\text{O}+\text{H}]^+$ ).

HR-MS calcd for  $\text{C}_{18}\text{H}_{41}^{79}\text{BrON}^+$  ( $[\text{M}+\text{NH}_4]^+$ ) 366.2366, found 366.2368.

$\nu_{\text{max}}$  (thin film,  $\text{cm}^{-1}$ ) 3274, 2917, 2850.

Mp 59–61 °C (lit. 60–62 °C)(12)

### Preparation of 18-bromooctadecanoic acid **19**(**12**, **18**)

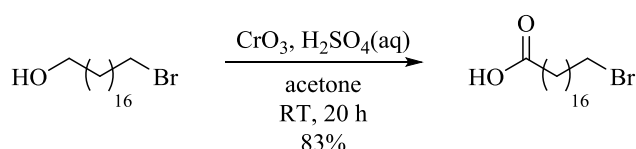

$\text{CrO}_3$  (1.42 g, 14.2 mmol) was dissolved in concentrated  $\text{H}_2\text{SO}_4$  (3.5 mL). Cold  $\text{H}_2\text{O}$  (7.9 mL) was added slowly and the solution stirred at room temperature for 10 min. The resulting solution was added drop-wise to a solution of alcohol **14** (1.65 g, 4.73 mmol) in acetone (120 mL). The reaction was stirred at room temperature for 20 h before being  $\text{H}_2\text{O}$  (60 mL) and  $\text{CH}_2\text{Cl}_2$  (40 mL) were added. The layers were separated and the aqueous phase extracted with  $\text{CH}_2\text{Cl}_2$  ( $4 \times 20$  mL). The combined

organics were washed with brine (20 mL), dried over MgSO<sub>4</sub>, filtered and concentrated *in vacuo*. The crude residue was purified by column chromatography, eluting with 90:10 petrol/EtOAc (+0.1% AcOH), to afford the product (1.43 g, 83%) as a white solid.

$\delta_{\text{H}}$  (400 MHz, CDCl<sub>3</sub>) 3.41 (t, 2H, *J* 6.9 Hz, CH<sub>2</sub>Br), 2.35 (t, 2H, *J* 7.5 Hz, CH<sub>2</sub>CO<sub>2</sub>H), 1.81–1.90 (m, 2H, CH<sub>2</sub>CH<sub>2</sub>Br), 1.59–1.68 (m, 2H, CH<sub>2</sub>CH<sub>2</sub>CO<sub>2</sub>H), 1.25–1.46 (m, 26H, 13 × CH<sub>2</sub>).

$\delta_{\text{C}}$  (101 MHz, CDCl<sub>3</sub>) 179.6, 34.2, 34.1, 33.0, 29.8, 29.7, 29.7, 29.6, 29.4, 29.2, 28.9, 28.3, 24.8.

LR-MS (EI+) 365.0 ([M(<sup>81</sup>Br)+H]<sup>+</sup>), 363.0 ([M(<sup>79</sup>Br)+H]<sup>+</sup>), 347.0 ([M(<sup>81</sup>Br)-H<sub>2</sub>O+H]<sup>+</sup>), 345.0 ([M(<sup>79</sup>Br)-H<sub>2</sub>O+H]<sup>+</sup>), 284.0 ([M-Br+H]<sup>+</sup>), 265.1 ([M-Br-H<sub>2</sub>O+H]<sup>+</sup>).

HR-MS calcd for C<sub>18</sub>H<sub>34</sub><sup>79</sup>BrO<sub>2</sub><sup>-</sup> ([M-H]<sup>-</sup>) 361.1748, found 361.1741.

$\nu_{\text{max}}$  (thin film, cm<sup>-1</sup>) 3034, 2915, 2850, 1696

Mp 77–80 °C (lit. 80 °C)(18)

### Preparation of 18-azidooctadecanoic acid **24**

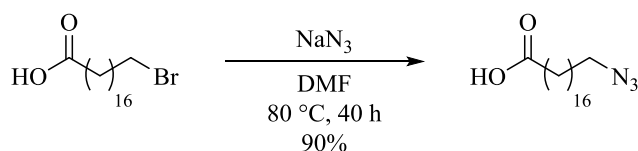

Reaction performed under a N<sub>2</sub> atmosphere

NaN<sub>3</sub> (537 mg, 8.3 mmol) was added to a solution of bromide **19** (500 mg, 1.38 mmol) in DMF (5.5 mL). The reaction was stirred at 80 °C for 40 h before being cooled to room temperature. A 1:1 mixture of EtOAc/H<sub>2</sub>O (30 mL) was added, the layers separated and the aqueous phase extracted with EtOAc (3 × 10 mL). The combined organics were washed with brine (10 mL), dried over MgSO<sub>4</sub>, filtered and concentrated *in vacuo*. The crude residue was purified by column chromatography, eluting with 90:10 petrol/EtOAc (+0.1% AcOH), to afford the product (403 mg, 90%) as a white solid.

$\delta_{\text{H}}$  (400 MHz, CDCl<sub>3</sub>) 3.25 (t, 2H, *J* 7.0 Hz, CH<sub>2</sub>N<sub>3</sub>), 2.34 (t, 2H, *J* 7.5 Hz, CH<sub>2</sub>CO<sub>2</sub>H), 1.55–1.67 (m, 4H, CH<sub>2</sub>CH<sub>2</sub>N<sub>3</sub>, CH<sub>2</sub>CH<sub>2</sub>CO<sub>2</sub>H), 1.25–1.39 (m, 26H, 13 × CH<sub>2</sub>).

$\delta_{\text{C}}$  (101 MHz, CDCl<sub>3</sub>) 180.1, 51.6, 34.2, 29.8, 29.7, 29.7, 29.6, 29.6, 29.4, 29.4, 29.3, 29.2, 29.0, 26.7, 24.8.

LR-MS (ES-) 296.3 ([M-N<sub>2</sub>-H]<sup>-</sup>), 324.1 ([M-H]<sup>-</sup>).

HR-MS calcd for C<sub>18</sub>H<sub>34</sub>N<sub>3</sub>O<sub>2</sub><sup>-</sup> ([M-H]<sup>-</sup>) 324.2657, found 324.2649.

$\nu_{\text{max}}$  (thin film, cm<sup>-1</sup>) 3040, 2915, 2850, 2098, 1696.

Mp 56–58 °C

### Preparation of 20-(trimethylsilyl)icos-19-ynoic acid **29**

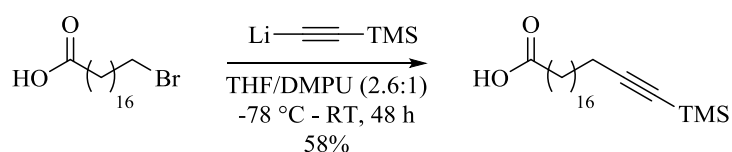

Reaction performed under a  $\text{N}_2$  atmosphere.

$^n\text{BuLi}$  (2.00 M, 6.9 mL, 13.8 mmol) was added drop-wise to a solution of (trimethylsilyl)acetylene (1.36 g, 1.95 mL, 13.8 mmol) in THF (20 mL) at  $-78\text{ }^\circ\text{C}$ . The reaction was stirred at  $-78\text{ }^\circ\text{C}$  for 1 h before DMPU (15.3 mL) was added and the reaction stirred for a further 30 min. A solution of bromide **19** (500 mg, 1.38 mmol) in THF (14.5 mL) was added drop-wise and the reaction stirred at room temperature for 48 h. Upon completion, the reaction was quenched with HCl (20 mL of a 1 M solution). The layers were separated and the aqueous phase extracted with  $\text{Et}_2\text{O}$  ( $4 \times 20\text{ mL}$ ). The combined organics were washed with brine ( $3 \times 20\text{ mL}$ ), dried over  $\text{MgSO}_4$ , filtered and concentrated *in vacuo*. The crude residue was purified by column chromatography, eluting with 90:10 petrol/EtOAc (+0.1% AcOH), to afford the product (305 mg, 58%) as a white solid.

$\delta_{\text{H}}$  (400 MHz,  $\text{CDCl}_3$ ) 2.34 (t, 2H,  $J$  7.5 Hz,  $\text{CH}_2\text{CO}_2\text{H}$ ), 2.21 (t, 2H,  $J$  7.2 Hz,  $\text{CH}_2\text{C}\equiv\text{CSi}$ ), 1.59–1.67 (m, 2H,  $\text{CH}_2\text{CH}_2\text{CO}_2\text{H}$ ), 1.47–1.55 (m, 2H,  $\text{CH}_2\text{CH}_2\text{C}\equiv\text{CSi}$ ), 1.25–1.39 (m, 26H,  $13 \times \text{CH}_2$ ), 0.14 (s, 9H,  $\text{Si}(\text{CH}_3)_3$ ).

$\delta_{\text{C}}$  (101 MHz,  $\text{CDCl}_3$ ) 179.8, 108.0, 84.4, 34.1, 29.8, 29.7, 29.6, 29.6, 29.4, 29.2, 29.0, 28.8, 24.8, 20.0, 0.3.

LR-MS (ES-) 379.3 ( $[\text{M}-\text{H}]^-$ ).

HR-MS calcd for  $\text{C}_{23}\text{H}_{43}\text{O}_2^-$  ( $[\text{M}-\text{H}]^-$ ) 379.3038, found 379.3030.

$\nu_{\text{max}}$  (thin film,  $\text{cm}^{-1}$ ) 2937, 2917, 2850, 2178, 1714, 1699.

Mp  $58\text{--}60\text{ }^\circ\text{C}$

### Preparation of icos-19-ynoic acid **32**

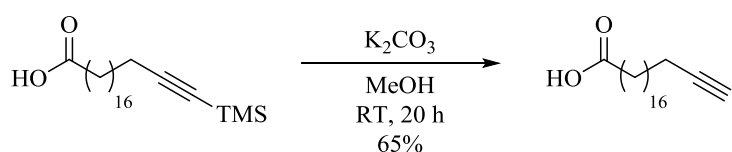

$\text{K}_2\text{CO}_3$  (233 mg, 1.69 mmol) was added to a solution of TMS-alkyne **29** (257 mg, 0.67 mmol) in methanol (6.7 mL) at room temperature. The reaction was stirred at room temperature for 20 h before the solvent was evaporated *in vacuo*. The residue was dissolved in EtOAc (15 mL) and HCl (15 mL of a 1 M aqueous solution) added. The layers were separated and the aqueous phase extracted with EtOAc ( $3 \times 20\text{ mL}$ ). The combined organics were washed with brine (20 mL), dried over  $\text{MgSO}_4$ , filtered and concentrated *in vacuo*. The crude residue was purified by column chromatography, eluting with 90:10 petrol/EtOAc (+0.1% AcOH), to afford the product (134 mg, 65%) as a white solid.

$\delta_{\text{H}}$  (400 MHz,  $\text{CDCl}_3$ ) 2.34 (t, 2H,  $J$  7.5 Hz,  $\text{CH}_2\text{CO}_2\text{H}$ ), 2.18 (td, 2H,  $J$  7.1 Hz,  $^4J$  2.6 Hz,  $\text{CH}_2\text{C}\equiv\text{CH}$ ), 1.93 (t, 1H,  $^4J$  2.6 Hz,  $\text{C}\equiv\text{CH}$ ), 1.58–1.68 (m, 2H,  $\text{CH}_2\text{CH}_2\text{CO}_2\text{H}$ ), 1.48–1.56 (m, 2H,  $\text{CH}_2\text{CH}_2\text{C}\equiv\text{CH}$ ), 1.24–1.43 (m, 26H,  $13 \times \text{CH}_2$ ).

$\delta_{\text{C}}$  (101 MHz,  $\text{CDCl}_3$ ) 179.9, 85.0, 68.2, 34.1, 29.8, 29.7, 29.7, 29.6, 29.4, 29.3, 29.2, 28.9, 28.7, 24.8, 18.5.

LR-MS (ES-) 307.2 ( $[\text{M}-\text{H}]^-$ ).

HR-MS calcd for  $\text{C}_{20}\text{H}_{35}\text{O}_2^-$  ( $[\text{M}-\text{H}]^-$ ) 307.2643, found 307.2636.

$\nu_{\text{max}}$  (thin film,  $\text{cm}^{-1}$ ) 3282, 2915, 2850, 2115, 1694.

Mp 76–78 °C

### Preparation of 1,20-icosanediol 10(19-22)

#### Method A

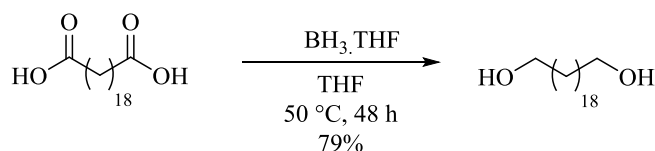

Reaction performed under a  $\text{N}_2$  atmosphere.

$\text{BH}_3 \cdot \text{THF}$  (1 M, 8.8 mL, 8.8 mmol) was added to a solution of icosanedioic acid (1.00 g, 2.92 mmol) in THF (58 mL). The reaction was heated to 50 °C for 24 h before additional  $\text{BH}_3 \cdot \text{THF}$  (1 M, 2.9 mL, 2.9 mmol) was added. The reaction was heated for a further 24 h before being cooled to 0 °C, quenched with MeOH (20 mL) and stirred for 30 min. HCl (20 mL of a 2 M aqueous solution) was added and the mixture stirred for 1 h. The solvent was evaporated *in vacuo* and the remaining aqueous phase extracted with  $\text{CHCl}_3$  ( $3 \times 30$  mL). The combined organic phase was washed with  $\text{H}_2\text{O}$  (30 mL), brine (30 mL), dried over  $\text{MgSO}_4$ , filtered and concentrated *in vacuo* to afford the product (724 mg, 79%) as white solid.

#### Method B

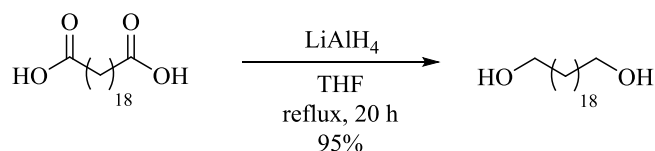

Reaction performed under a  $\text{N}_2$  atmosphere.

Solid  $\text{LiAlH}_4$  (1.44 g, 37.96 mmol) was added to a vigorously stirred solution of icosanedioic acid (5.00 g, 14.6 mmol) at room temperature. The reaction was heated to reflux and stirred at reflux for 20 h. Upon completion, the reaction was cooled to room temperature and wet  $\text{NaSO}_4$  was added portion-wise until the grey suspension turned white. The suspension was stirred at room temperature until the white solid was free-flowing, and solid  $\text{MgSO}_4$  was added. The reaction was filtered and the

filter cake washed with Et<sub>2</sub>O (5 × 50 mL). The solvent was evaporated *in vacuo* to afford the product (4.35 g, 95%) as a white solid.

δ<sub>H</sub> (600 MHz, DMSO-d<sub>6</sub>) 3.38 (t, 4H, *J* 6.5 Hz, 2 × CH<sub>2</sub>OH), 1.37–1.45 (m, 4H, 2 × CH<sub>2</sub>CH<sub>2</sub>OH), 1.23 (app. br. s., 32H, 16 × CH<sub>2</sub>).

δ<sub>C</sub> (151 MHz, DMSO-d<sub>6</sub>) 60.6, 32.3, 28.8, 28.7, 28.7, 25.3.

LR-MS (MALDI-TOF) 337.3 ([M+Na]<sup>+</sup>).

HR-MS calcd for C<sub>20</sub>H<sub>43</sub>O<sub>2</sub><sup>+</sup> ([M+H]<sup>+</sup>) 315.3258, found 315.3259.

ν<sub>max</sub> (thin film, cm<sup>-1</sup>) 3252, 2915, 2848.

Mp 103–105 °C (lit. 102–105 °C)(20)

### Preparation of 20-bromoicosan-1-ol 15

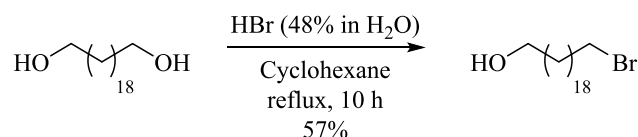

HBr (48% in H<sub>2</sub>O, 36 mL) was added to a suspension of diol **10** (4.35 g, 13.6 mmol) in cyclohexane (86 mL). The biphasic mixture was heated to reflux for 10 h before being cooled to room temperature. The layers were separated and the aqueous phase extracted with CH<sub>2</sub>Cl<sub>2</sub> (4 × 50 mL). The combined organics were washed with NaHCO<sub>3</sub> (4 × 30 mL of a saturated aqueous solution), brine (30 mL), dried over MgSO<sub>4</sub>, filtered and concentrated *in vacuo*. The crude residue was purified by column chromatography, eluting with 95:5 petrol/EtOAc then 70:30 petrol/EtOAc, to afford the product (2.94 g, 57%) as a pale yellow solid.

δ<sub>H</sub> (400 MHz, CDCl<sub>3</sub>) 3.64 (t, 2H, *J* 6.6 Hz, CH<sub>2</sub>OH), 3.41 (t, 2H, *J* 6.9 Hz, CH<sub>2</sub>Br), 1.81–1.89 (m, 2H, CH<sub>2</sub>CH<sub>2</sub>Br), 1.53–1.59 (m, 2H, CH<sub>2</sub>CH<sub>2</sub>OH), 1.25–1.45 (m, 32H, 16 × CH<sub>2</sub>).

δ<sub>C</sub> (101 MHz, CDCl<sub>3</sub>) 63.3, 34.2, 33.0, 33.0, 29.8, 29.8, 29.7, 29.6, 28.9, 28.3, 25.9.

LR-MS (EI<sup>+</sup>) 376.4 ([M(<sup>81</sup>Br)+H]<sup>+</sup>), 374.4 ([M(<sup>79</sup>Br)+H]<sup>+</sup>), 361.1 ([M(<sup>81</sup>Br)-H<sub>2</sub>O+H]<sup>+</sup>), 359.1 ([M(<sup>79</sup>Br)-H<sub>2</sub>O+H]<sup>+</sup>), 296.6 ([M-Br+H]<sup>+</sup>).

HR-MS calcd for C<sub>20</sub>H<sub>40</sub><sup>79</sup>Br<sup>+</sup> ([M-H<sub>2</sub>O+H]<sup>+</sup>) 359.2313, found 359.2313.

ν<sub>max</sub> (thin film, cm<sup>-1</sup>) 3270, 2915, 2846.

Mp 66–68 °C

### Preparation of 20-bromoicosanoic acid 20

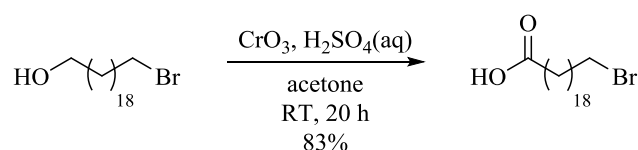

CrO<sub>3</sub> (3.12 g, 31.2 mmol) was dissolved in concentrated H<sub>2</sub>SO<sub>4</sub> (5.7 mL). Cold H<sub>2</sub>O (13 mL) was added slowly and the solution stirred at room temperature for 10 min. The resulting solution was added drop-wise to a solution of alcohol **15** (2.94 g, 7.8 mmol) in acetone (195 mL). The reaction was stirred at room temperature for 20 h before being H<sub>2</sub>O (100 mL) and CH<sub>2</sub>Cl<sub>2</sub> (50 mL) were added. The layers were separated and the aqueous phase extracted with CH<sub>2</sub>Cl<sub>2</sub> (4 × 50 mL). The combined organics were washed with brine (50 mL), dried over MgSO<sub>4</sub>, filtered and concentrated *in vacuo*. The crude residue was purified by column chromatography, eluting with 90:10 petrol/EtOAc (+0.1% AcOH), to afford the product (2.53 g, 83%) as a white solid.

$\delta_{\text{H}}$  (400 MHz, CDCl<sub>3</sub>) 3.41 (t, 2H, *J* 6.9 Hz, CH<sub>2</sub>Br), 2.35 (t, 2H, *J* 7.5 Hz, CH<sub>2</sub>CO<sub>2</sub>H), 1.81–1.90 (m, 2H, CH<sub>2</sub>CH<sub>2</sub>Br), 1.59–1.68 (m, 2H, CH<sub>2</sub>CH<sub>2</sub>CO<sub>2</sub>H), 1.25–1.46 (m, 30H, 15 × CH<sub>2</sub>).

$\delta_{\text{C}}$  (101 MHz, CDCl<sub>3</sub>) 178.9, 34.2, 34.0, 33.0, 29.8, 29.7, 29.6, 29.4, 29.2, 28.9, 28.3, 24.8.

LR-MS (EI+) 393.0 ([M(<sup>81</sup>Br)+H]<sup>+</sup>), 391.0 ([M(<sup>79</sup>Br)+H]<sup>+</sup>), 375.0 ([M(<sup>81</sup>Br)-H<sub>2</sub>O+H]<sup>+</sup>), 373.0 ([M(<sup>79</sup>Br)-H<sub>2</sub>O+H]<sup>+</sup>), 312.0 ([M-Br+H]<sup>+</sup>), 293.1 ([M-Br-H<sub>2</sub>O+H]<sup>+</sup>).

HR-MS calcd for C<sub>20</sub>H<sub>38</sub><sup>79</sup>BrO<sup>-</sup> ([M-H]<sup>-</sup>) 389.2061, found 389.2057.

$\nu_{\text{max}}$  (thin film, cm<sup>-1</sup>) 2914, 2848, 1693.

Mp 81–83 °C

#### Preparation of 20-azidoicosanoic acid **25**

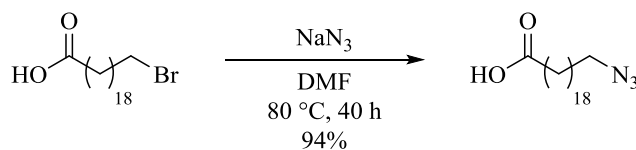

Reaction performed under a N<sub>2</sub> atmosphere

NaN<sub>3</sub> (499 mg, 7.7 mmol) was added to a solution of bromide **20** (500 mg, 1.28 mmol) in DMF (5 mL). The reaction was stirred at 80 °C for 40 h before being cooled to room temperature. A 1:1 mixture of EtOAc/H<sub>2</sub>O (30 mL) was added, the layers separated and the aqueous phase extracted with EtOAc (3 × 15 mL). The combined organics were washed with brine (15 mL), dried over MgSO<sub>4</sub>, filtered and concentrated *in vacuo*. The crude residue was purified by column chromatography, eluting with 90:10 petrol/EtOAc (+0.1% AcOH), to afford the product (425 mg, 94%) as a white solid.

$\delta_{\text{H}}$  (400 MHz, CDCl<sub>3</sub>) 3.25 (t, 2H, *J* 7.0 Hz, CH<sub>2</sub>N<sub>3</sub>), 2.35 (t, 2H, *J* 7.5 Hz, CH<sub>2</sub>CO<sub>2</sub>H), 1.55–1.67 (m, 4H, CH<sub>2</sub>CH<sub>2</sub>N<sub>3</sub>, CH<sub>2</sub>CH<sub>2</sub>CO<sub>2</sub>H), 1.25–1.39 (m, 30H, 15 × CH<sub>2</sub>).

$\delta_{\text{C}}$  (101 MHz, CDCl<sub>3</sub>) 179.6, 51.7, 34.1, 29.8, 29.8, 29.7, 29.7, 29.6, 29.6, 29.4, 29.3, 29.2, 29.0, 26.9, 24.8.

LR-MS (ES-) 324.3 ([M-N<sub>2</sub>-H]<sup>-</sup>), 352.3 ([M-H]<sup>-</sup>).

HR-MS calcd for C<sub>20</sub>H<sub>38</sub>N<sub>3</sub>O<sub>2</sub><sup>-</sup> ([M-H]<sup>-</sup>) 352.2970, found 352.2963.

$\nu_{\text{max}}$  (thin film, cm<sup>-1</sup>) 3012, 2915, 2848, 2111, 1701.



Mp 63–65 °C

### Preparation of 1,22-docosanediol 11(23)

#### Method A

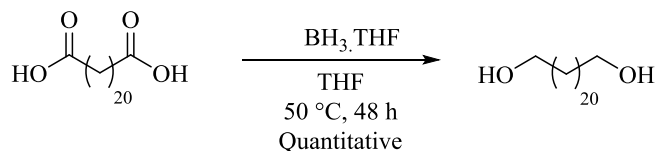

Reaction performed under a N<sub>2</sub> atmosphere.

BH<sub>3</sub>.THF (1 M, 8.2 mL, 8.2 mmol) was added to a solution of docosanedioic acid (1.00 g, 2.70 mmol) in THF (51 mL). The reaction was heated to 50 °C for 24 h before additional BH<sub>3</sub>.THF (1 M, 2.7 mL, 2.7 mmol) was added. The reaction was heated for a further 24 h before being cooled to 0 °C, quenched with MeOH (20 mL) and stirred for 30 min. HCl (20 mL of a 2 M aqueous solution) was added and the mixture stirred for 1 h. The solvent was evaporated *in vacuo* and the remaining aqueous phase extracted with CHCl<sub>3</sub> (3 × 30 mL). The combined organic phase was washed with H<sub>2</sub>O (30 mL), brine (30 mL), dried over MgSO<sub>4</sub>, filtered and concentrated *in vacuo* to afford the product (974 mg, 100%) as white solid.

#### Method B

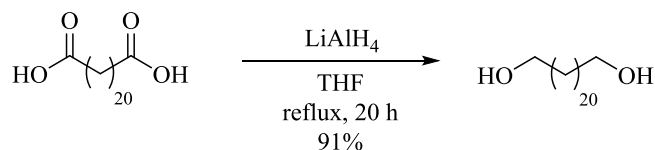

Reaction performed under a N<sub>2</sub> atmosphere.

Solid LiAlH<sub>4</sub> (1.36 g, 35.9 mmol) was added to a vigorously stirred solution of docosanedioic acid (5.12 g, 13.8 mmol) at room temperature. The reaction was heated to reflux and stirred at reflux for 20 h. Upon completion, the reaction was cooled to room temperature and wet NaSO<sub>4</sub> was added portion-wise until the grey suspension turned white. The suspension was stirred at room temperature until the white solid was free-flowing, and solid MgSO<sub>4</sub> was added. The reaction was filtered and the filter cake washed with Et<sub>2</sub>O (5 × 50 mL). The solvent was evaporated *in vacuo* to afford the product (4.30 g, 91%) as a white solid.

$\delta_{\text{H}}$  (600 MHz, DMSO-d<sub>6</sub>) 4.17 (t, 2H, *J* 5.1 Hz, 2 × OH), 3.36–3.40 (m, 4H, 2 × CH<sub>2</sub>OH), 1.38–1.44 (m, 4H, 2 × CH<sub>2</sub>CH<sub>2</sub>OH), 1.25 (app. br. s., 36H, 18 × CH<sub>2</sub>).

$\delta_{\text{C}}$  (151 MHz, DMSO-d<sub>6</sub>) 60.6, 32.3, 28.8, 28.8, 28.7, 25.3.

LR-MS (MALDI-TOF) 365.4 ([M+Na]<sup>+</sup>).

HR-MS calcd for C<sub>22</sub>H<sub>47</sub>O<sub>2</sub><sup>+</sup> ([M+H]<sup>+</sup>) 343.3571, found 343.3574.

$\nu_{\text{max}}$  (thin film, cm<sup>-1</sup>) 3255, 2915, 2848.

Mp 98–100 °C (lit. 96–98 °C)(23)

### Preparation of 22-bromodocosan-1-ol **16**(**24**)

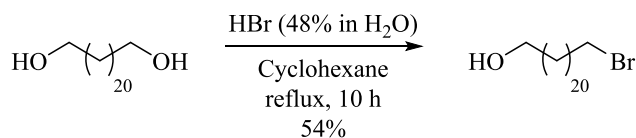

HBr (48% in H<sub>2</sub>O, 32 mL) was added to a suspension of diol **11** (4.16 g, 12.2 mmol) in cyclohexane (64 mL). The biphasic mixture was heated to reflux for 10 h before being cooled to room temperature. The layers were separated and the aqueous phase extracted with CH<sub>2</sub>Cl<sub>2</sub> (4 × 50 mL). The combined organics were washed with NaHCO<sub>3</sub> (4 × 30 mL of a saturated aqueous solution), brine (30 mL), dried over MgSO<sub>4</sub>, filtered and concentrated *in vacuo*. The crude residue was purified by column chromatography, eluting with 95:5 petrol/EtOAc then 70:30 petrol/EtOAc, to afford the product (2.65 g, 54%) as a pale yellow solid.

$\delta_{\text{H}}$  (400 MHz, CDCl<sub>3</sub>) 3.64 (t, 2H, *J* 6.6 Hz, CH<sub>2</sub>OH), 3.40 (t, 2H, *J* 6.9 Hz, CH<sub>2</sub>Br), 1.81–1.89 (m, 2H, CH<sub>2</sub>CH<sub>2</sub>Br), 1.53–1.60 (m, 2H, CH<sub>2</sub>CH<sub>2</sub>OH), 1.25–1.44 (m, 36H, 18 × CH<sub>2</sub>).

$\delta_{\text{C}}$  (101 MHz, CDCl<sub>3</sub>) 63.3, 34.2, 33.0, 33.0, 29.8, 29.8, 29.7, 29.6, 28.9, 28.3, 25.9.

LR-MS (EI+) 405.5 ([M(<sup>81</sup>Br)+H]<sup>+</sup>), 403.5 ([M(<sup>79</sup>Br)+H]<sup>+</sup>), 388.5 ([M(<sup>81</sup>Br)-H<sub>2</sub>O+H]<sup>+</sup>), 386.5 ([M(<sup>79</sup>Br)-H<sub>2</sub>O+H]<sup>+</sup>), 324.4 ([M-Br+H]<sup>+</sup>).

HR-MS calcd for C<sub>22</sub>H<sub>49</sub><sup>79</sup>BrON ([M+NH<sub>4</sub>]<sup>+</sup>) 422.2992, found 422.2990.

$\nu_{\text{max}}$  (thin film, cm<sup>-1</sup>) 3276, 2915, 2846.

Mp 66–68 °C (lit. 72 °C)(**24**)

### Preparation of 22-bromodocosanoic acid **21**

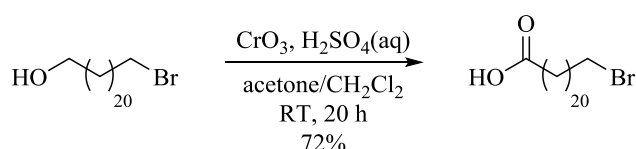

CrO<sub>3</sub> (696 mg, 6.96 mmol) was dissolved in concentrated H<sub>2</sub>SO<sub>4</sub> (1.3 mL). Cold H<sub>2</sub>O (2.9 mL) was added slowly and the solution stirred at room temperature for 10 min. The resulting solution was added drop-wise to a solution of alcohol **16** (703 mg, 1.74 mmol) in acetone/CH<sub>2</sub>Cl<sub>2</sub> (3:1, 65 mL). The reaction was stirred at room temperature for 20 h before being H<sub>2</sub>O (50 mL) and CH<sub>2</sub>Cl<sub>2</sub> (30 mL) were added. The layers were separated and the aqueous phase extracted with CH<sub>2</sub>Cl<sub>2</sub> (4 × 30 mL). The combined organics were washed with brine (30 mL), dried over MgSO<sub>4</sub>, filtered and concentrated *in vacuo*. The crude residue was purified by column chromatography, eluting with 90:10 petrol/EtOAc (+0.1% AcOH), to afford the product (522 mg, 72%) as a white solid.

$\delta_{\text{H}}$  (400 MHz, CDCl<sub>3</sub>) 3.40 (t, 2H, *J* 6.9 Hz, CH<sub>2</sub>Br), 2.35 (t, 2H, *J* 7.5 Hz, CH<sub>2</sub>CO<sub>2</sub>H), 1.81–1.90 (m, 2H, CH<sub>2</sub>CH<sub>2</sub>Br), 1.59–1.68 (m, 2H, CH<sub>2</sub>CH<sub>2</sub>CO<sub>2</sub>H), 1.25–1.44 (m, 34H, 17 × CH<sub>2</sub>).

$\delta_{\text{C}}$  (101 MHz, CDCl<sub>3</sub>) 179.4, 34.2, 34.1, 33.0, 29.8, 29.7, 29.6, 29.4, 29.2, 28.9, 28.3, 24.8.

LR-MS (EI+) 421.0 ([M(<sup>81</sup>Br)+H]<sup>+</sup>), 419.0 ([M(<sup>79</sup>Br)+H]<sup>+</sup>), 393.0 ([M(<sup>81</sup>Br)-H<sub>2</sub>O+H]<sup>+</sup>), 391.0 ([M(<sup>79</sup>Br)-H<sub>2</sub>O+H]<sup>+</sup>), 341.1 ([M-Br+H]<sup>+</sup>), 293.1 ([M-Br-H<sub>2</sub>O+H]<sup>+</sup>).

HR-MS calcd for  $C_{22}H_{42}^{79}BrO_2^-$  ( $[M-H]^-$ ) 417.2374, found 417.2368.

$\nu_{\max}$  (thin film,  $cm^{-1}$ ) 2913, 2846, 1693.

Mp 78–80 °C

### Preparation of 22-azidodocosanoic acid **26**

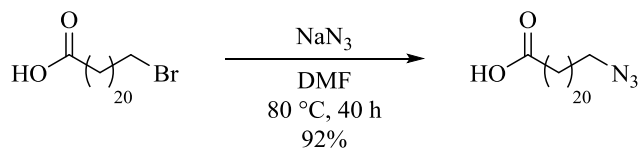

Reaction performed under a  $N_2$  atmosphere

$NaN_3$  (195 mg, 3.0 mmol) was added to a solution of bromide **21** (208 mg, 0.5 mmol) in DMF (2 mL). The reaction was stirred at 80 °C for 40 h before being cooled to room temperature. A 1:1 mixture of EtOAc/ $H_2O$  (20 mL) was added, the layers separated and the aqueous phase extracted with EtOAc (3 × 10 mL) and  $CH_2Cl_2$  (10 mL). The combined organics were washed with brine (15 mL), dried over  $MgSO_4$ , filtered and concentrated *in vacuo*. The crude residue was purified by column chromatography, eluting with 90:10 petrol/EtOAc (+0.1% AcOH), to afford the product (176 mg, 92%) as a white solid.

$\delta_H$  (400 MHz,  $CDCl_3$ ) 3.25 (t, 2H,  $J$  7.0 Hz,  $CH_2N_3$ ), 2.34 (t, 2H,  $J$  7.5 Hz,  $CH_2CO_2H$ ), 1.56–1.67 (m, 4H,  $CH_2CH_2N_3$ ,  $CH_2CH_2CO_2H$ ), 1.25–1.37 (m, 34H,  $17 \times CH_2$ ).

$\delta_C$  (101 MHz,  $CDCl_3$ ) 179.9, 51.7, 34.1, 29.8, 29.7, 29.7, 29.6, 29.6, 29.4, 29.3, 29.3, 29.2, 29.0, 26.9, 24.8.

LR-MS (ES-) 352.3 ( $[M-N_2-H]^-$ ), 380.3 ( $[M-H]^-$ ).

HR-MS calcd for  $C_{22}H_{42}N_3O_2^-$  ( $[M-H]^-$ ) 380.3283, found 380.3275.

$\nu_{\max}$  (thin film,  $cm^{-1}$ ) 2913, 2846, 2095, 1693.

Mp 71–73 °C

14-Azidotetradecanoic acid **22**  $^1\text{H}$  NMR (400 MHz,  $\text{CDCl}_3$ )

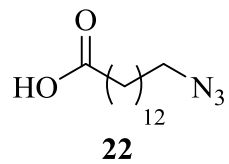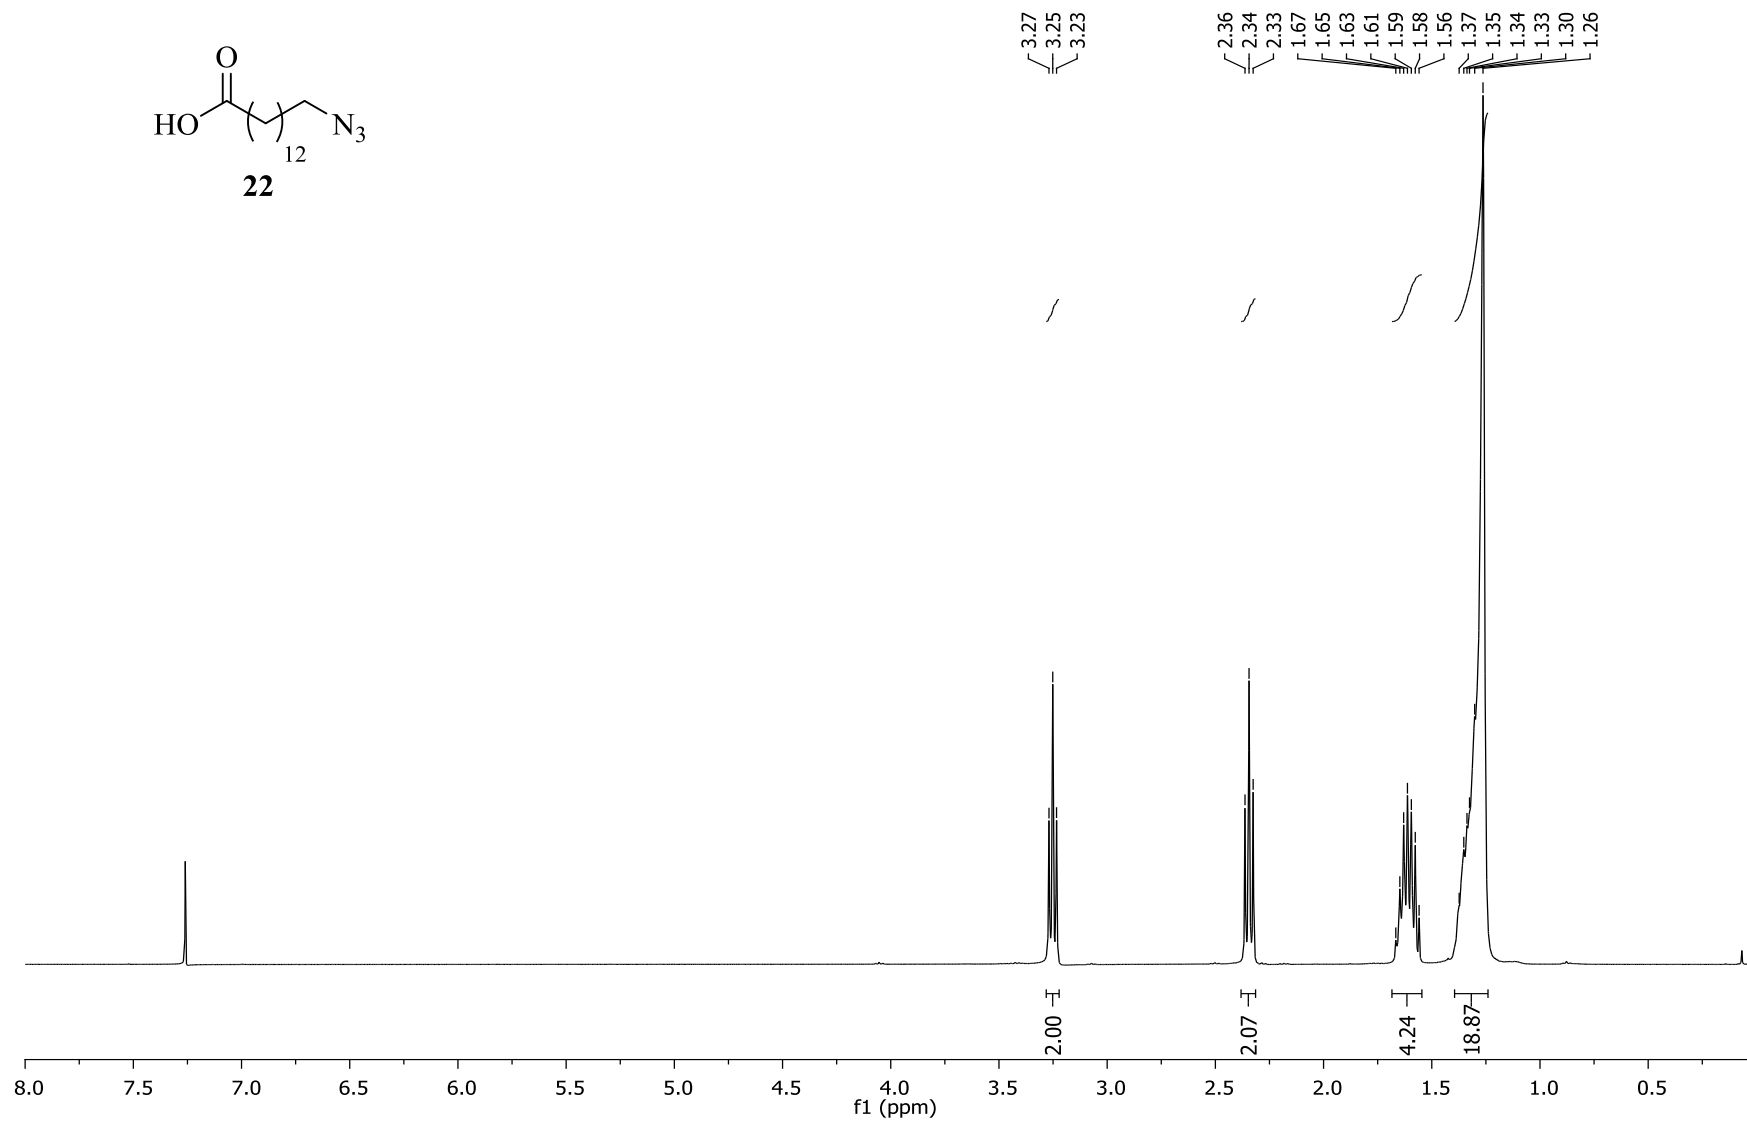

14-Azidotetradecanoic acid **22**  $^{13}\text{C}$  NMR (101 MHz,  $\text{CDCl}_3$ )

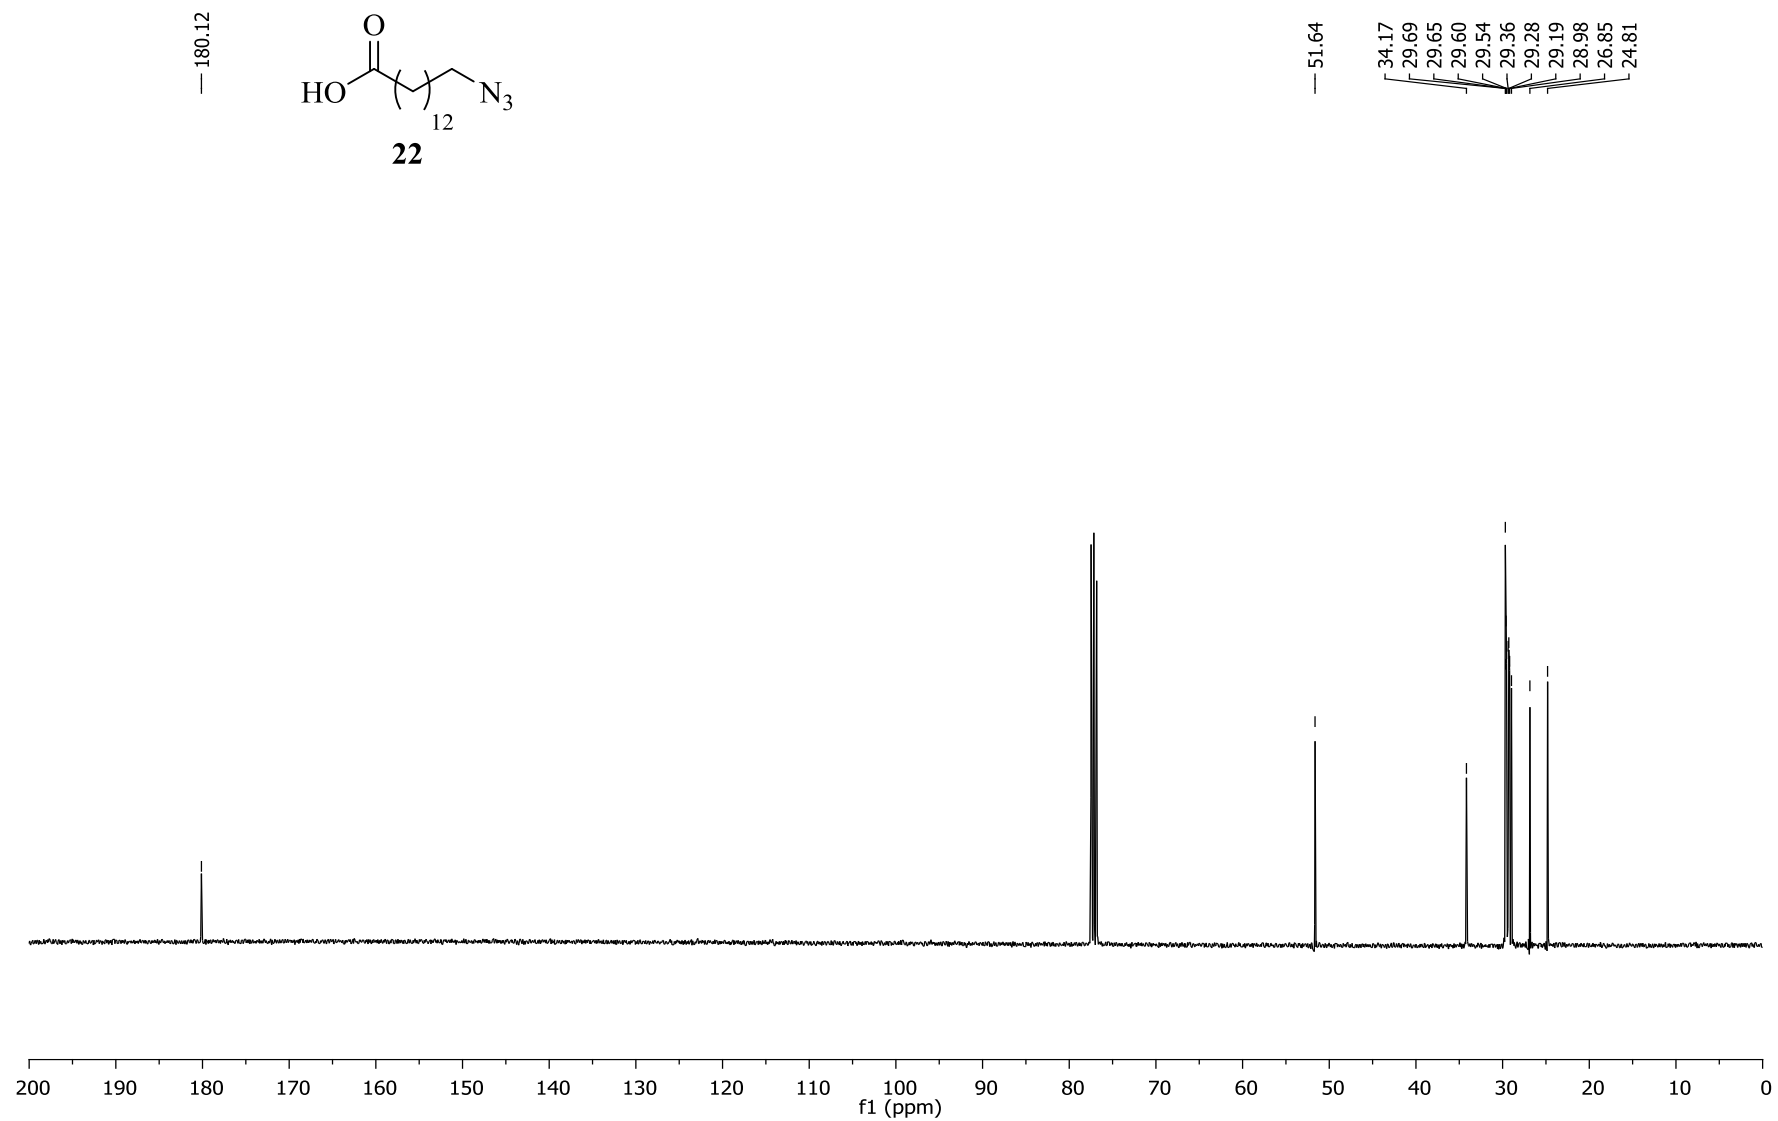

16-Azidohexadecanoic acid **23**  $^1\text{H}$  NMR (400 MHz,  $\text{CDCl}_3$ )

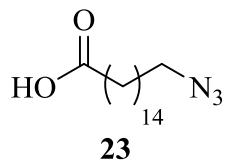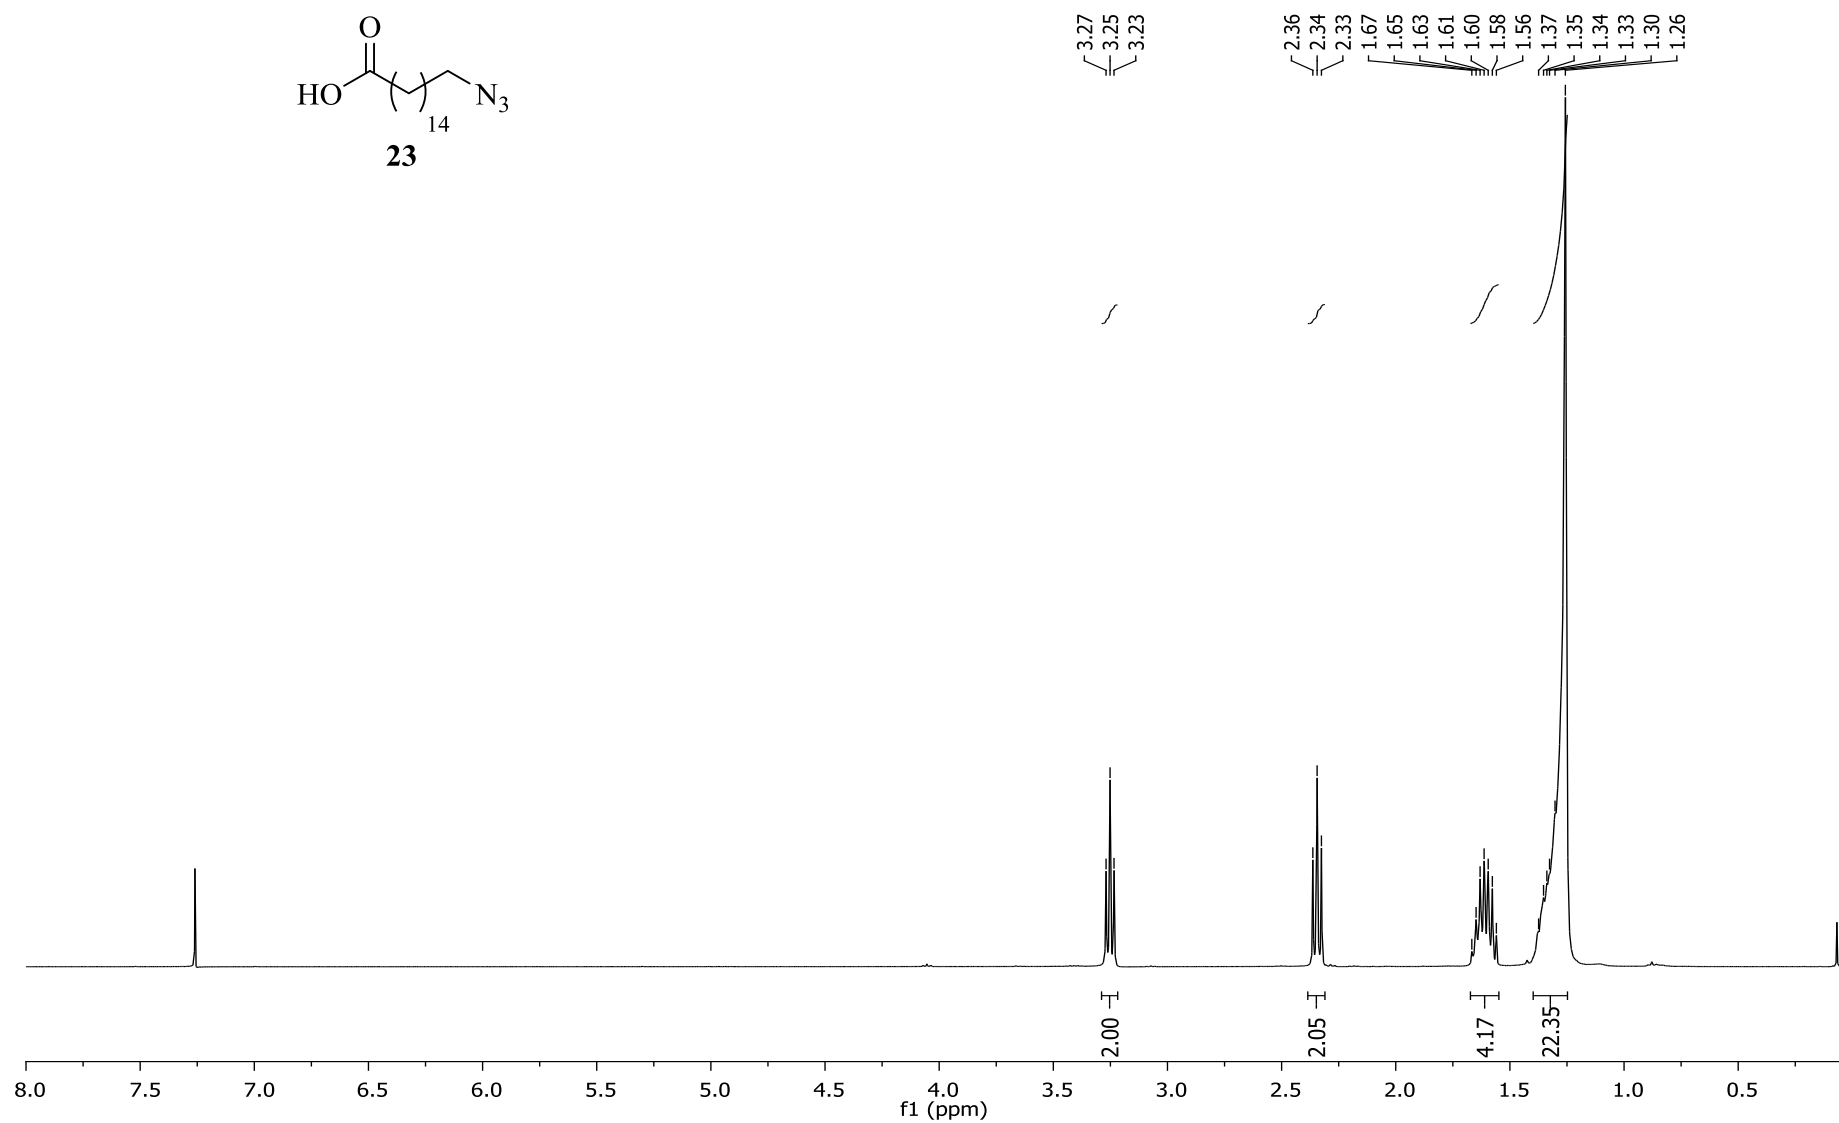

16-Azidohexadecanoic acid **23**  $^{13}\text{C}$  NMR (101 MHz,  $\text{CDCl}_3$ )

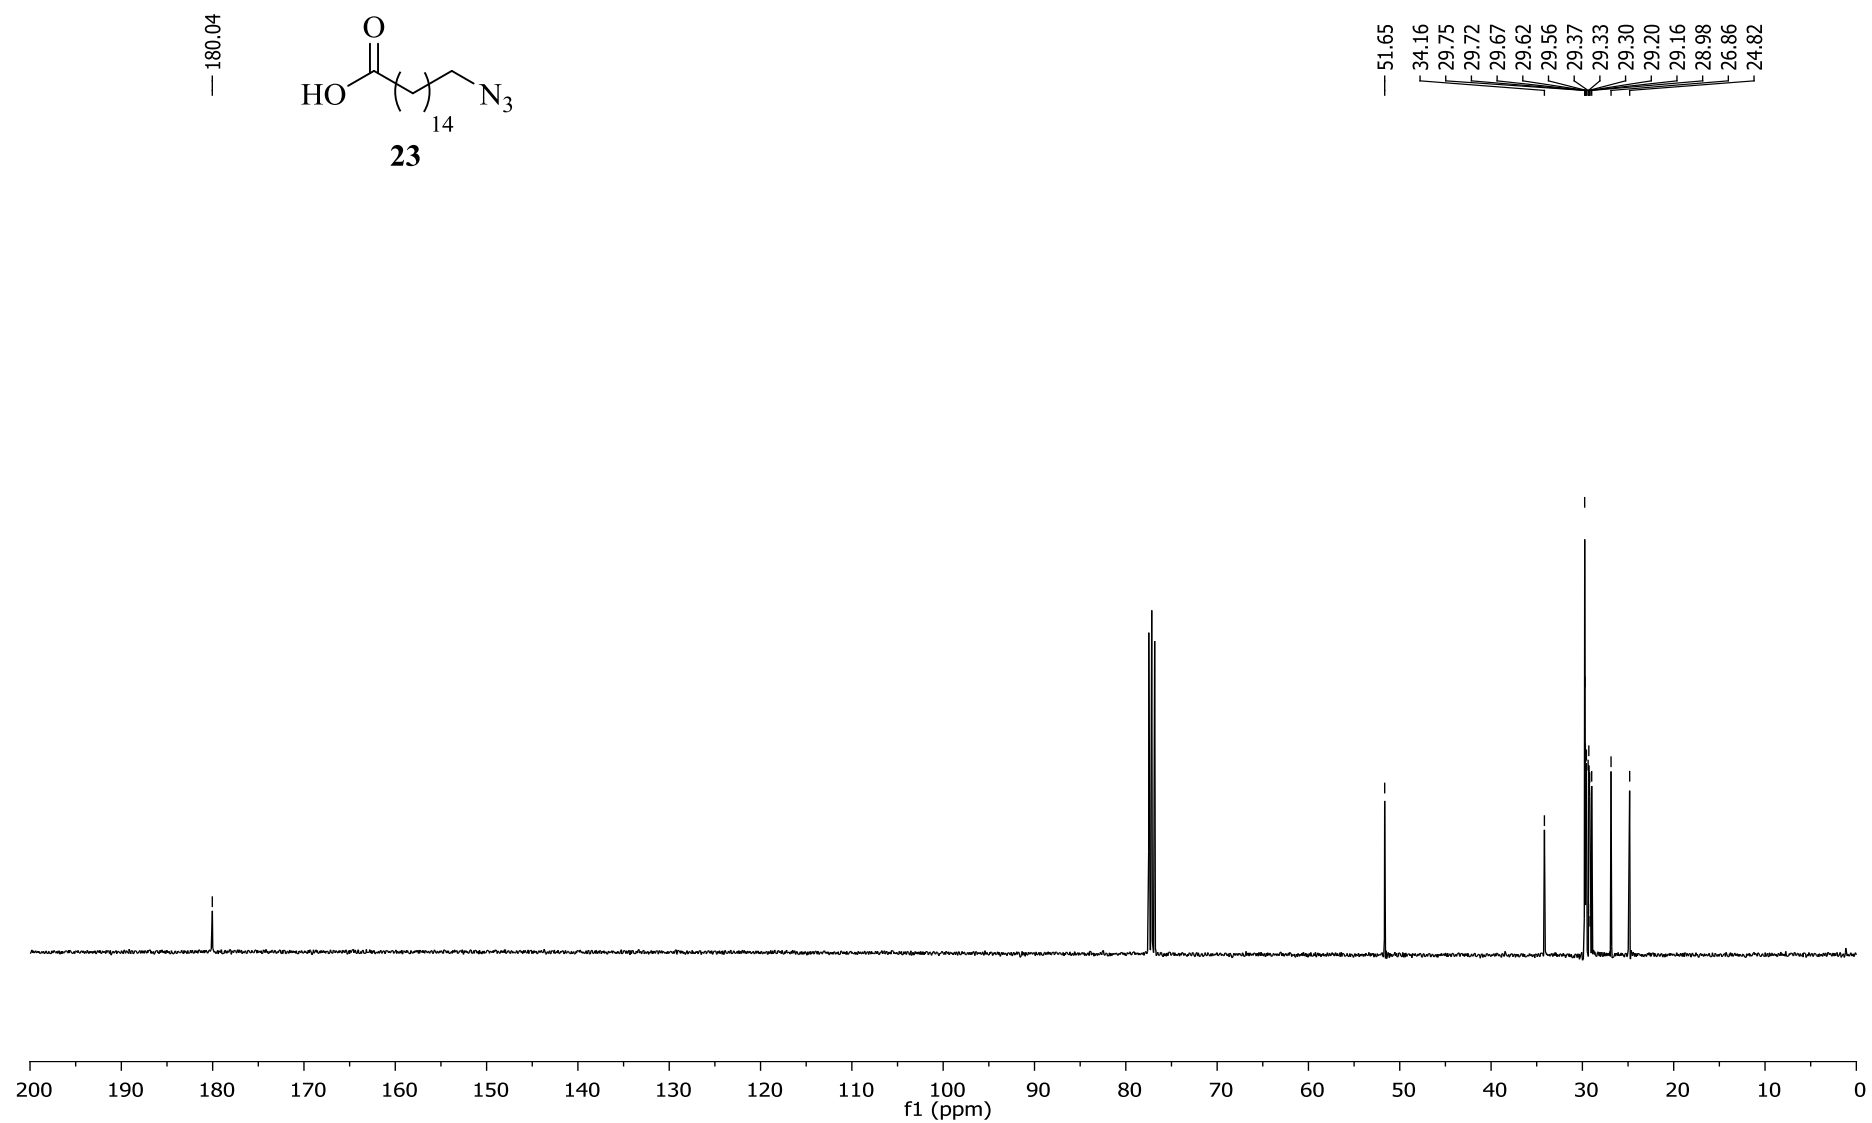

18-Azidoctadecanoic acid **24**  $^1\text{H}$  NMR (400 MHz,  $\text{CDCl}_3$ )

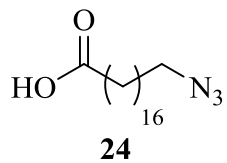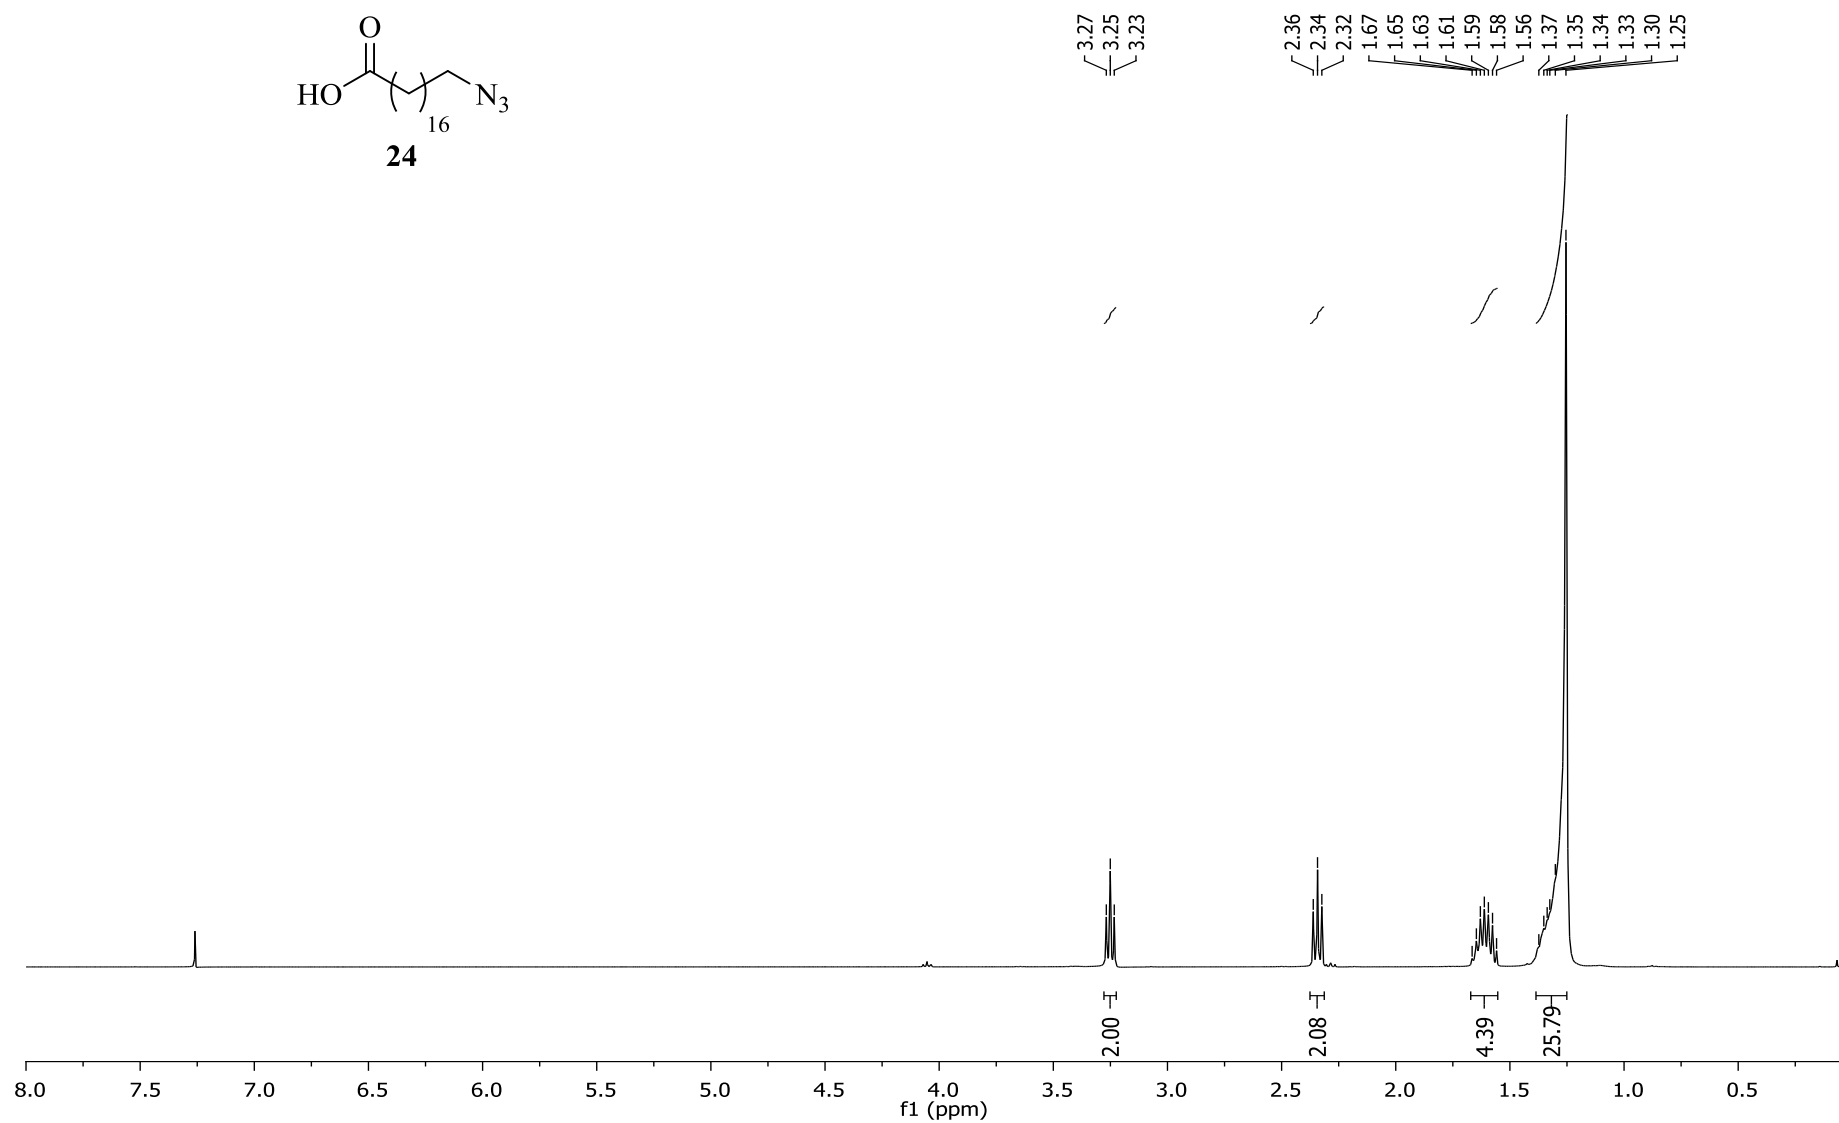



18-Azidoctadecanoic acid **24**  $^{13}\text{C}$  NMR (101 MHz,  $\text{CDCl}_3$ )

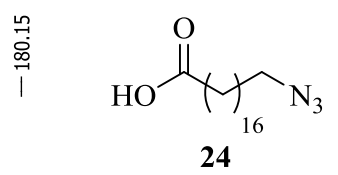

- 180.15
- 51.65
- 34.19
- 29.79
- 29.73
- 29.68
- 29.62
- 29.57
- 29.42
- 29.38
- 29.30
- 29.21
- 28.98
- 26.86
- 24.82

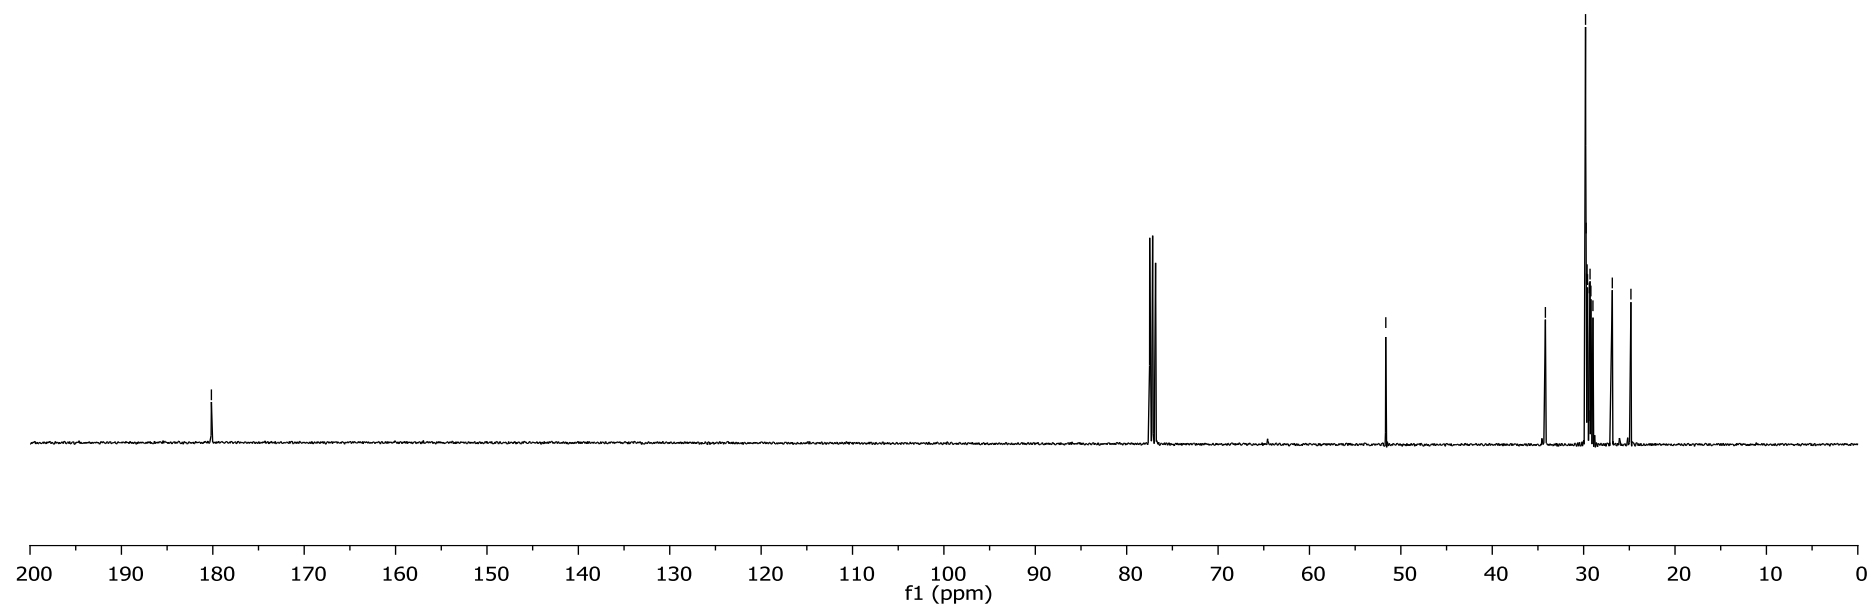

20-Azidoicosanoic acid **25**  $^1\text{H}$  NMR (400 MHz,  $\text{CDCl}_3$ )

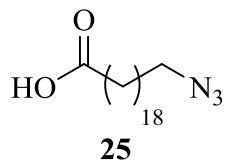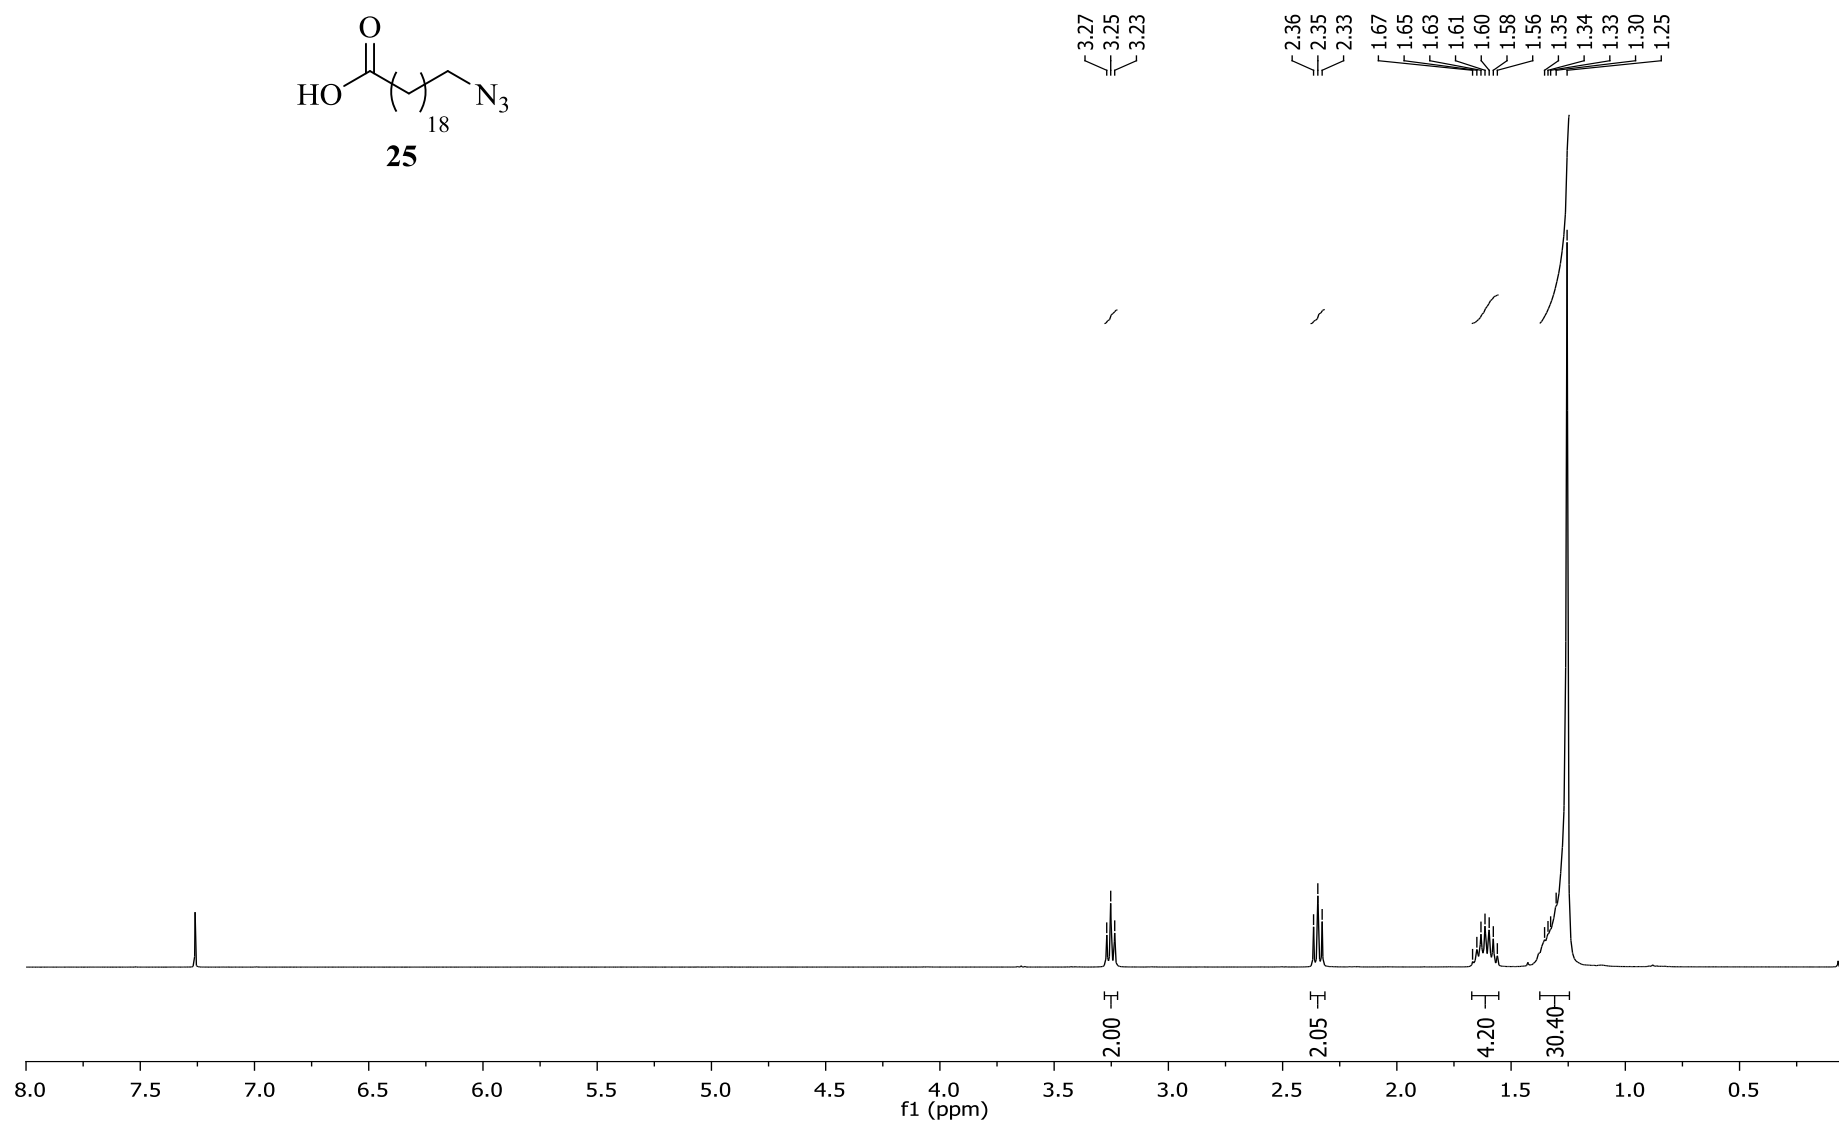

20-Azidoicosanoic acid **25**  $^{13}\text{C}$  NMR (101 MHz,  $\text{CDCl}_3$ )

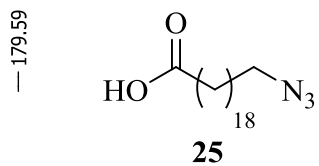

— 51.65

34.08  
29.82  
29.78  
29.74  
29.69  
29.63  
29.58  
29.38  
29.30  
29.21  
28.99  
26.87  
24.83

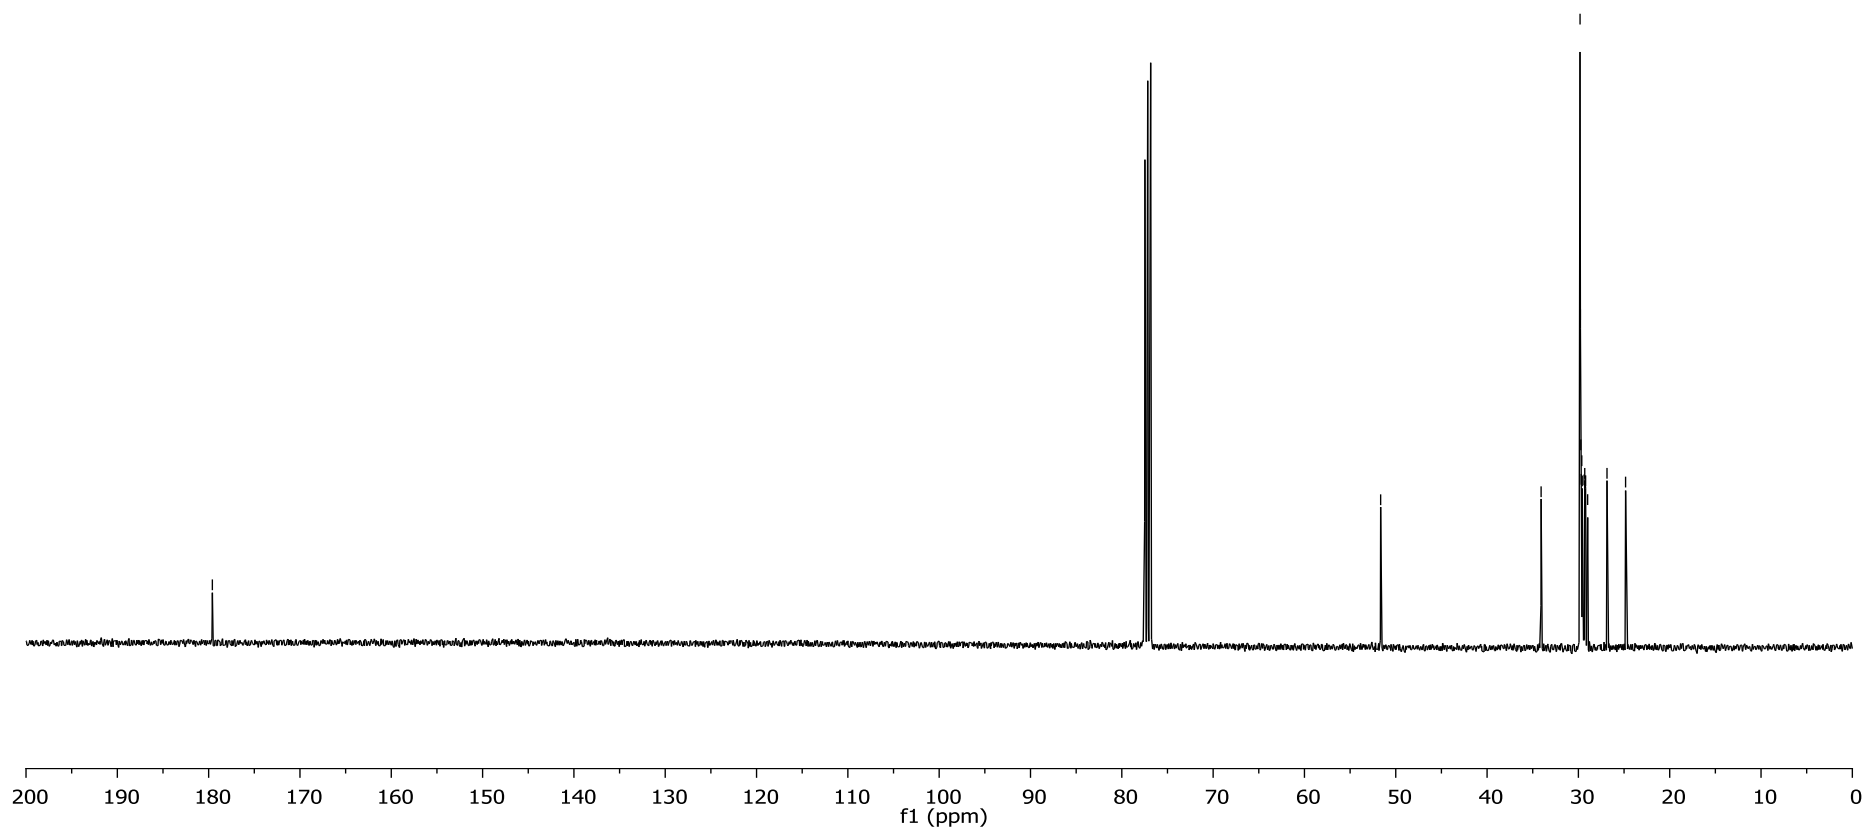

22-Azidodocosanoic acid **26**  $^1\text{H}$  NMR (400 MHz,  $\text{CDCl}_3$ )

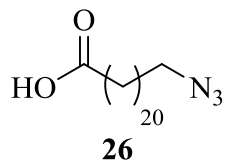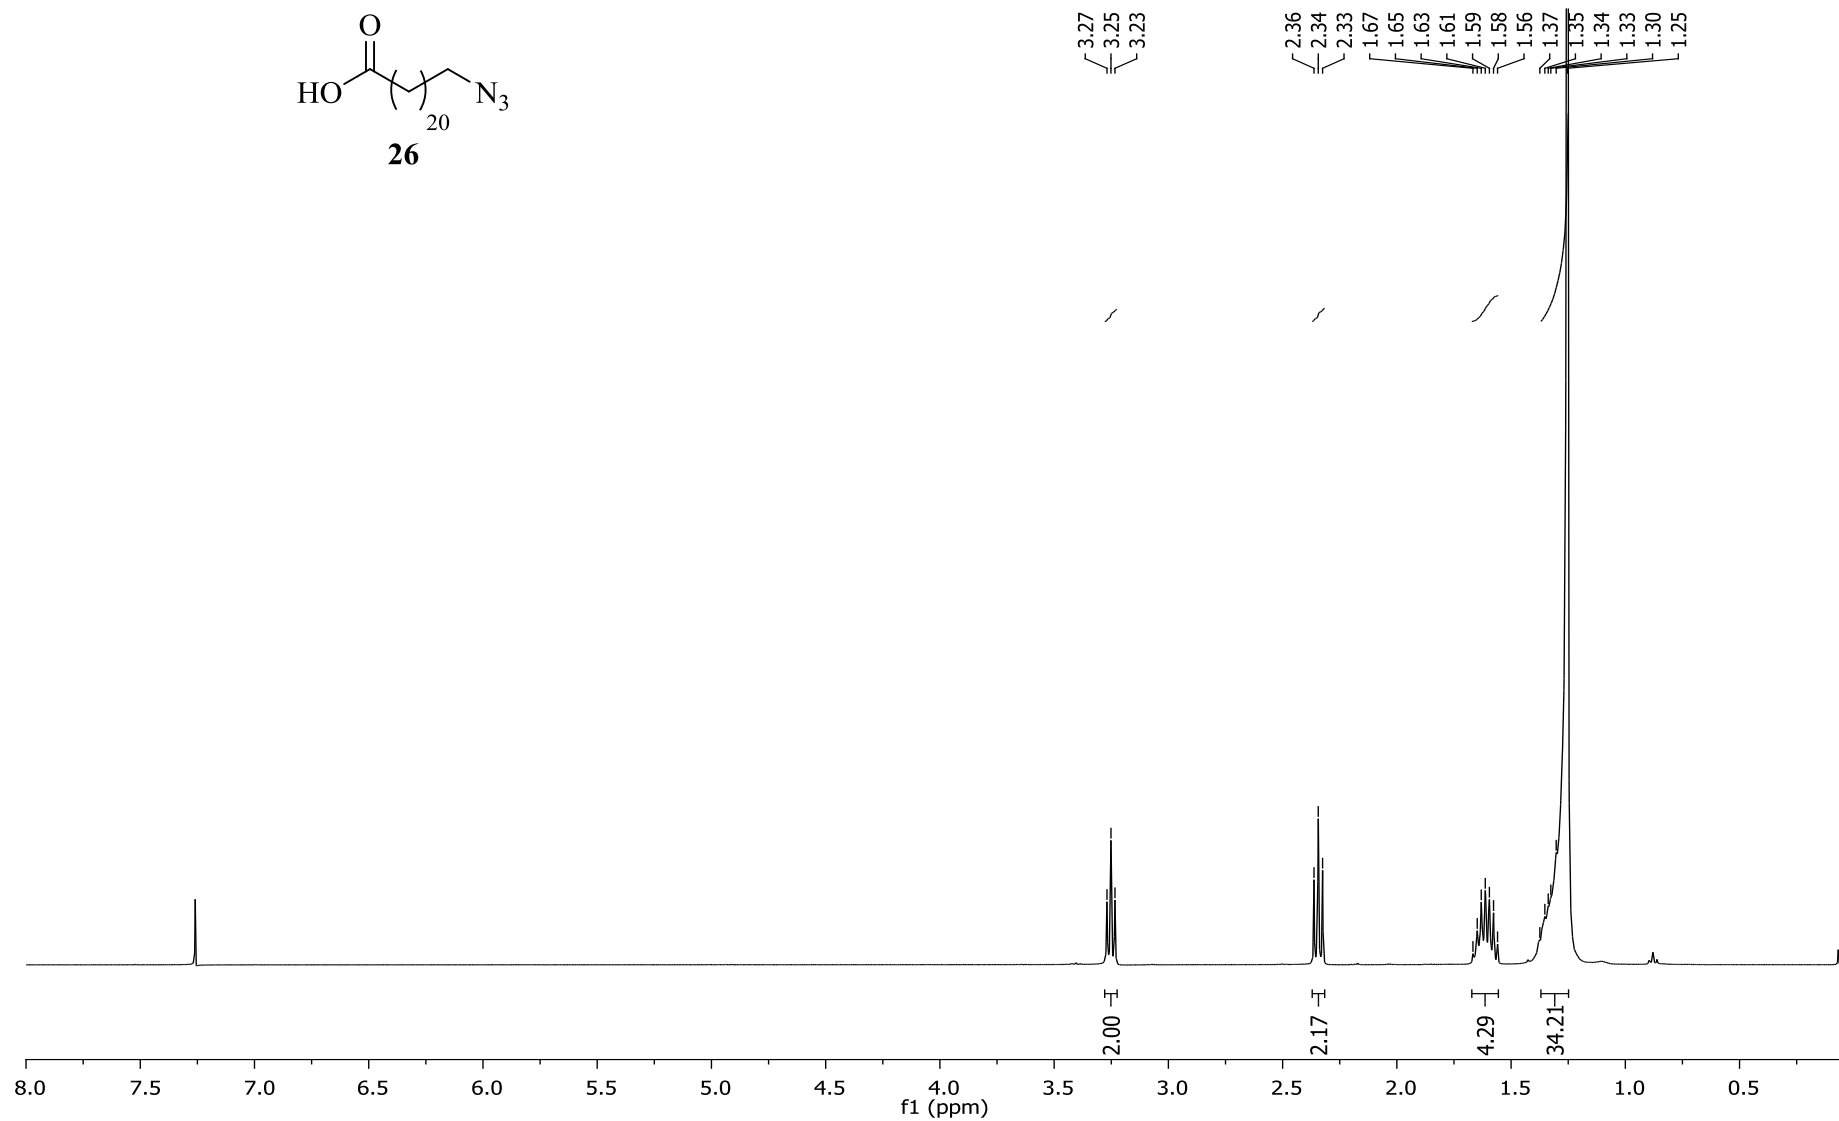

22-Azidocosanoic acid **26**  $^{13}\text{C}$  NMR (101 MHz,  $\text{CDCl}_3$ )

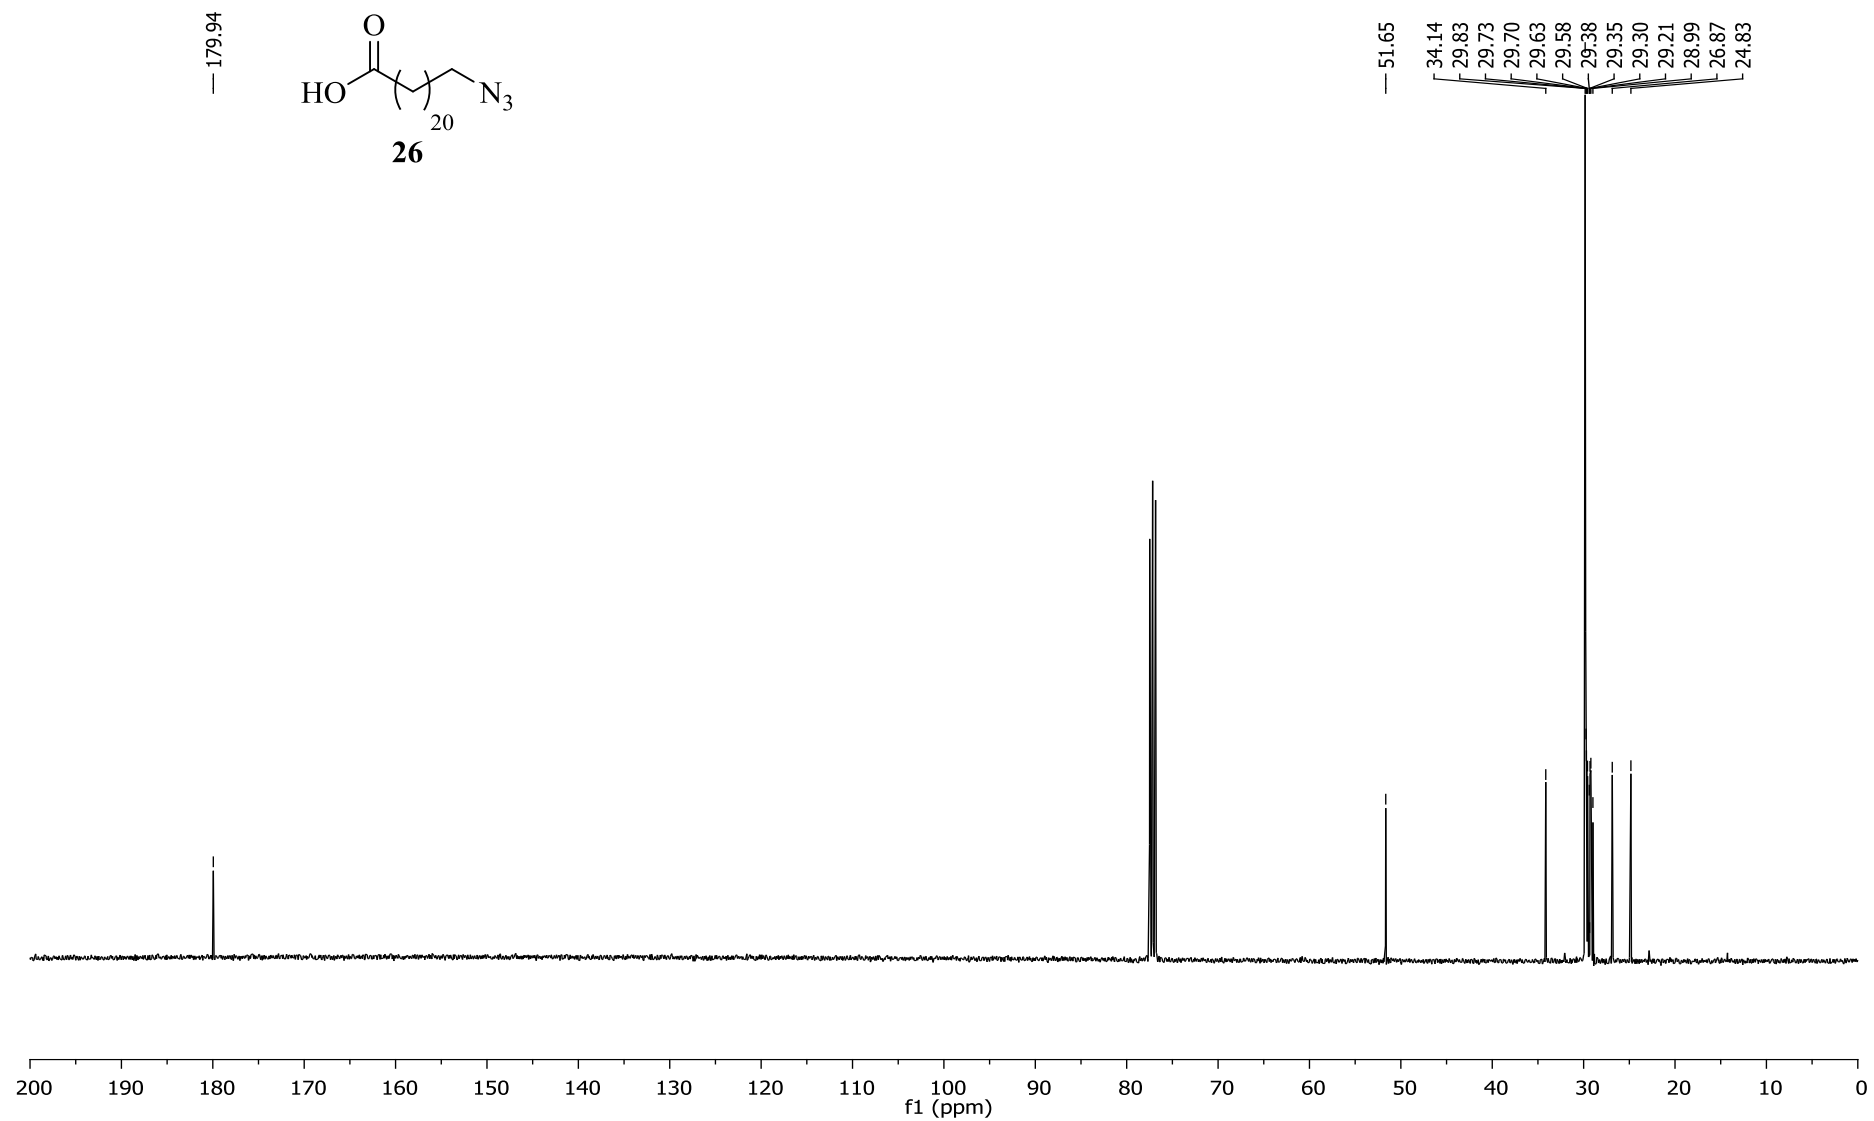

Hexadec-15-ynoic acid **30**  $^1\text{H}$  NMR (400 MHz,  $\text{CDCl}_3$ )

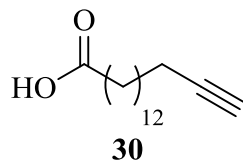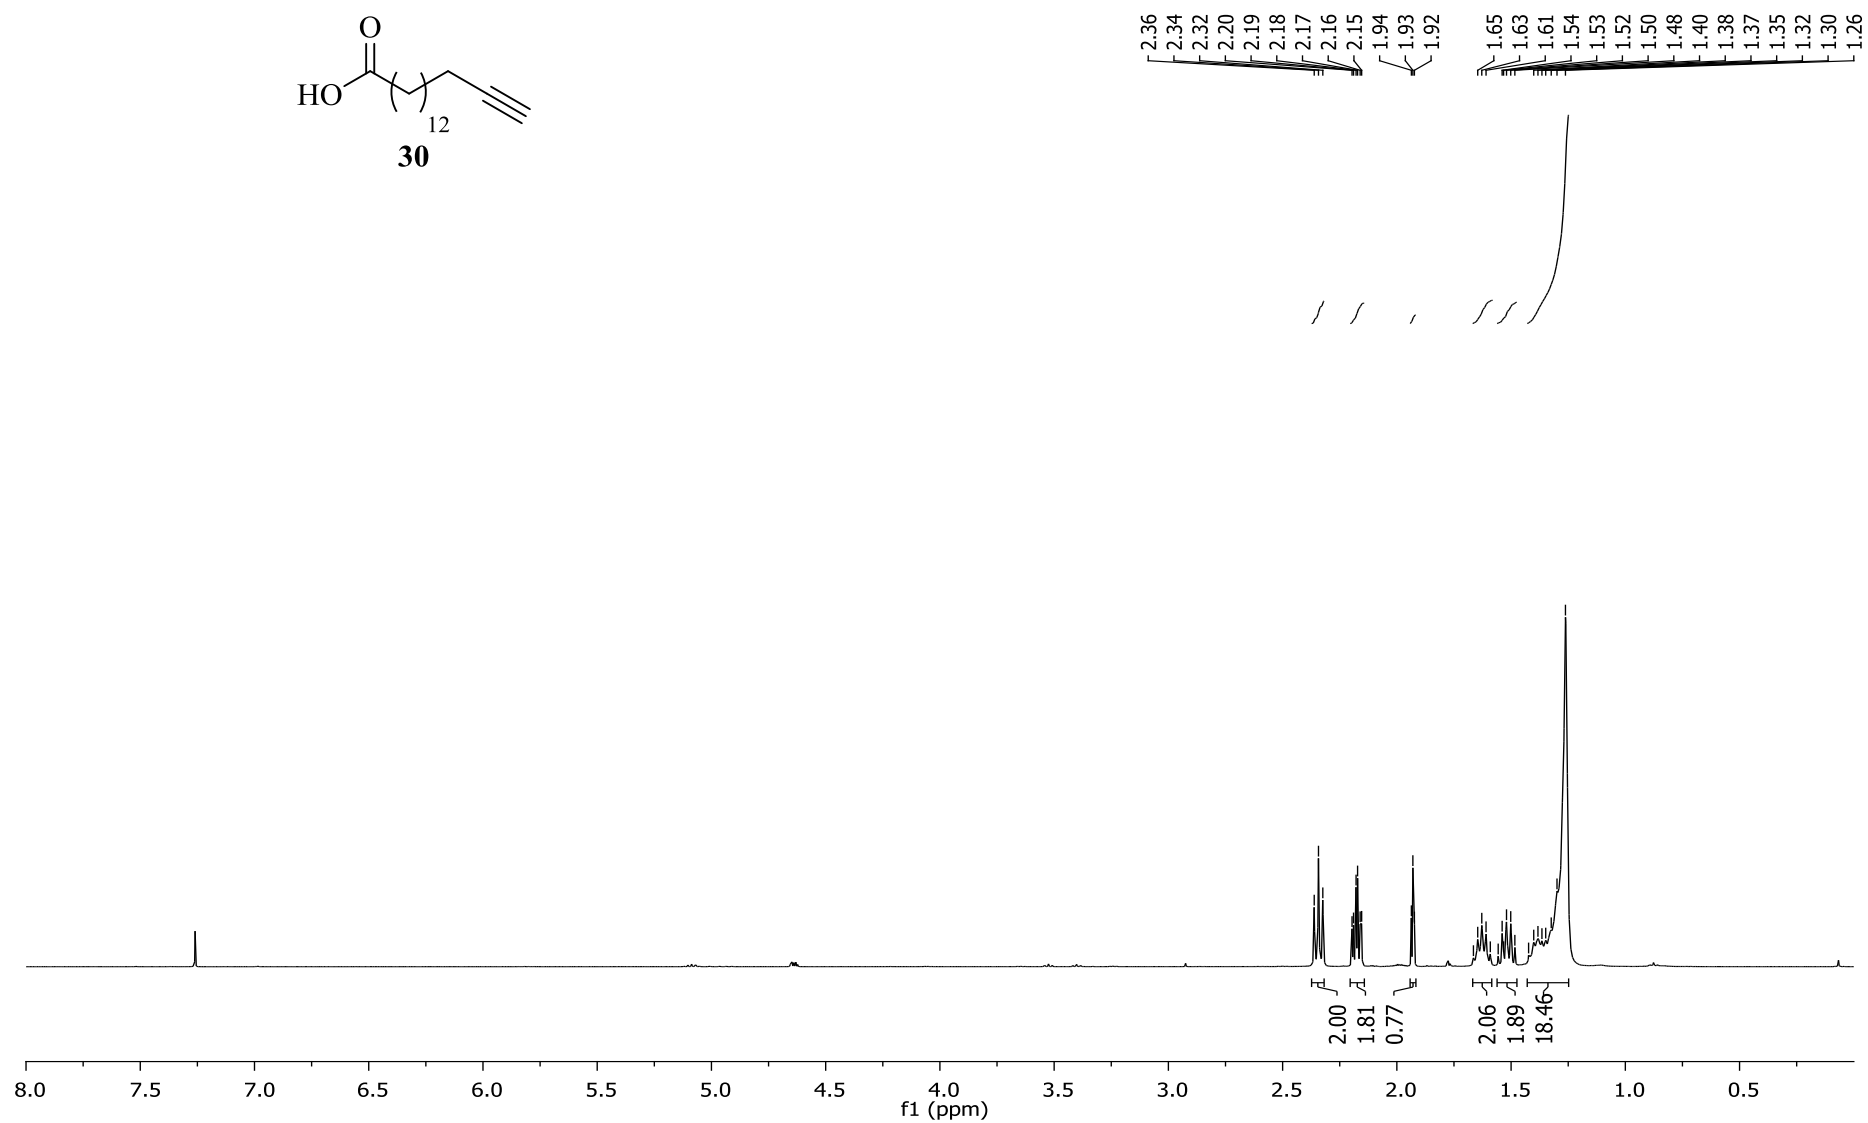

Hexadec-15-ynoic acid **30**  $^{13}\text{C}$  NMR (101 MHz,  $\text{CDCl}_3$ )

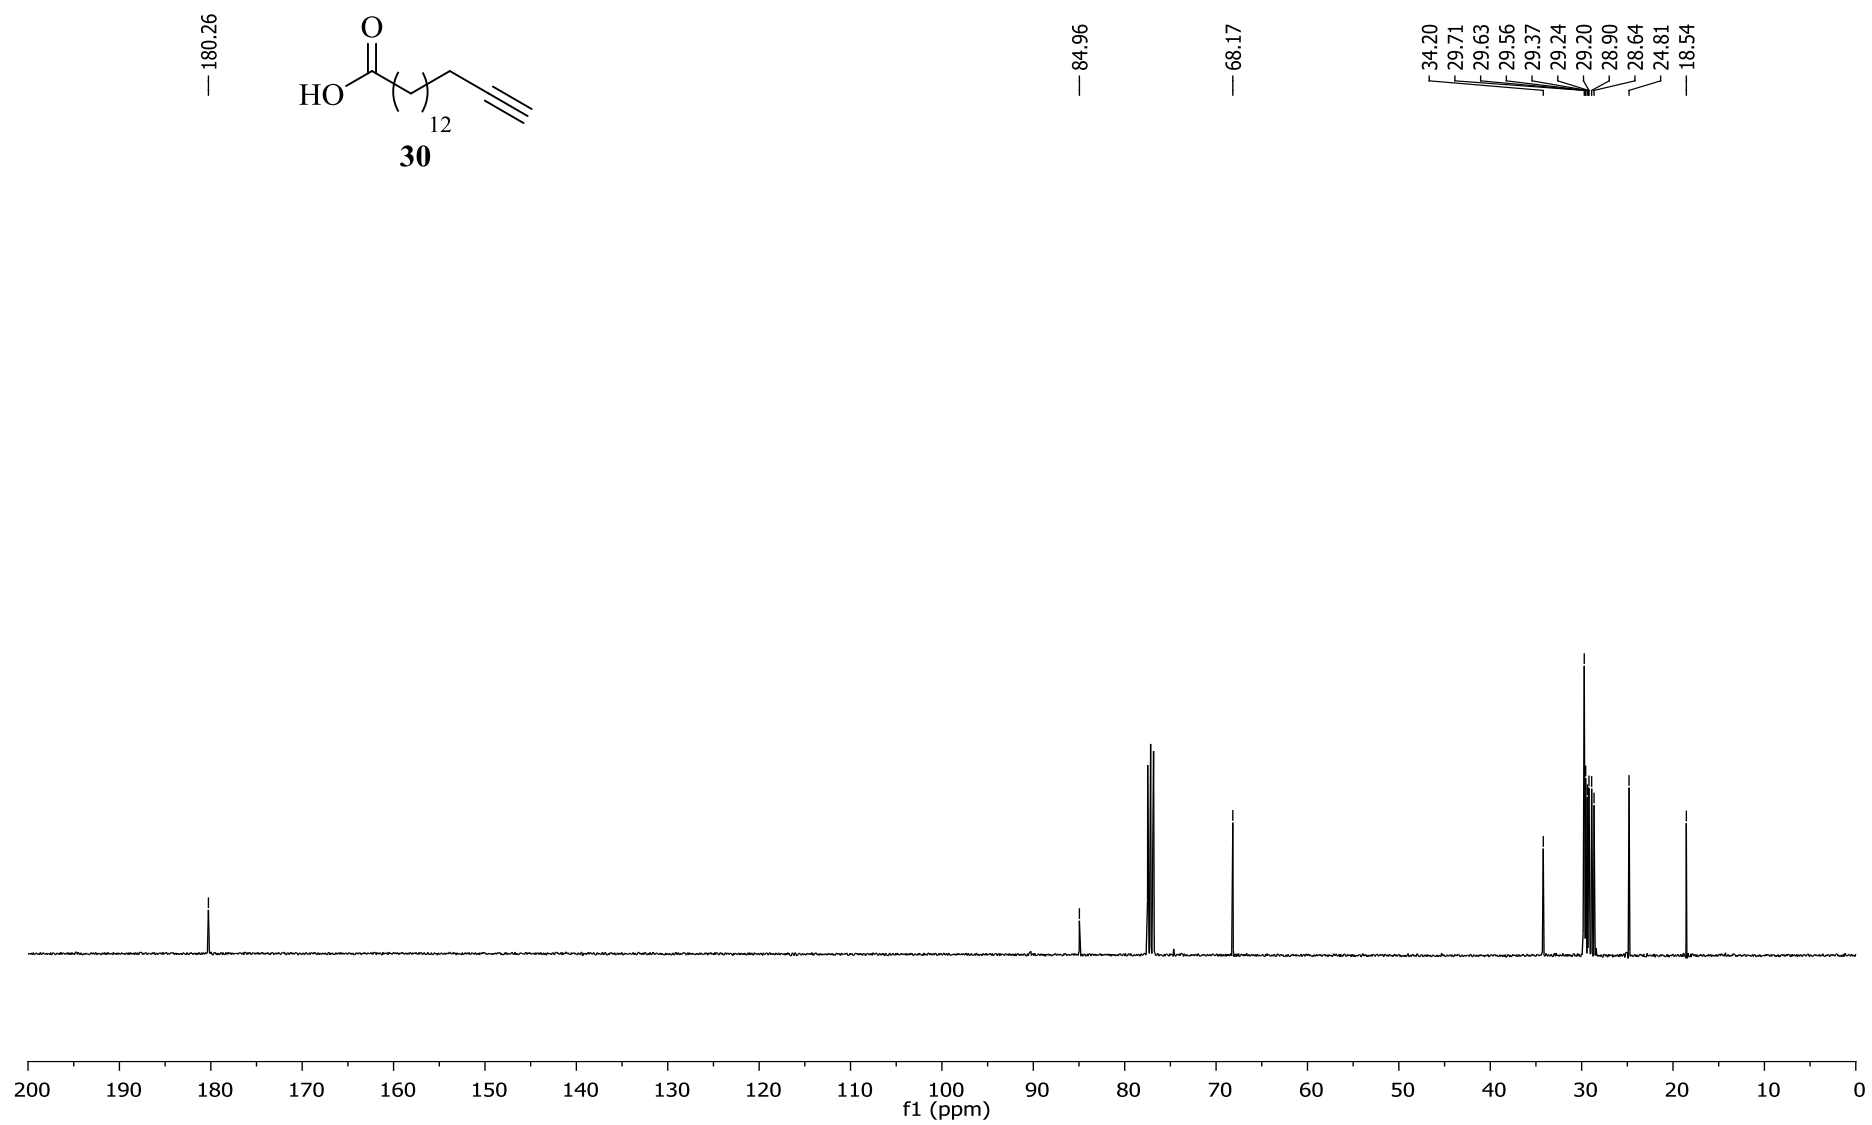

Octadec-17-ynoic acid **31**  $^1\text{H}$  NMR (400 MHz,  $\text{CDCl}_3$ )

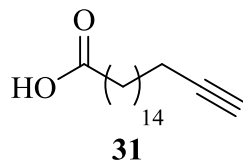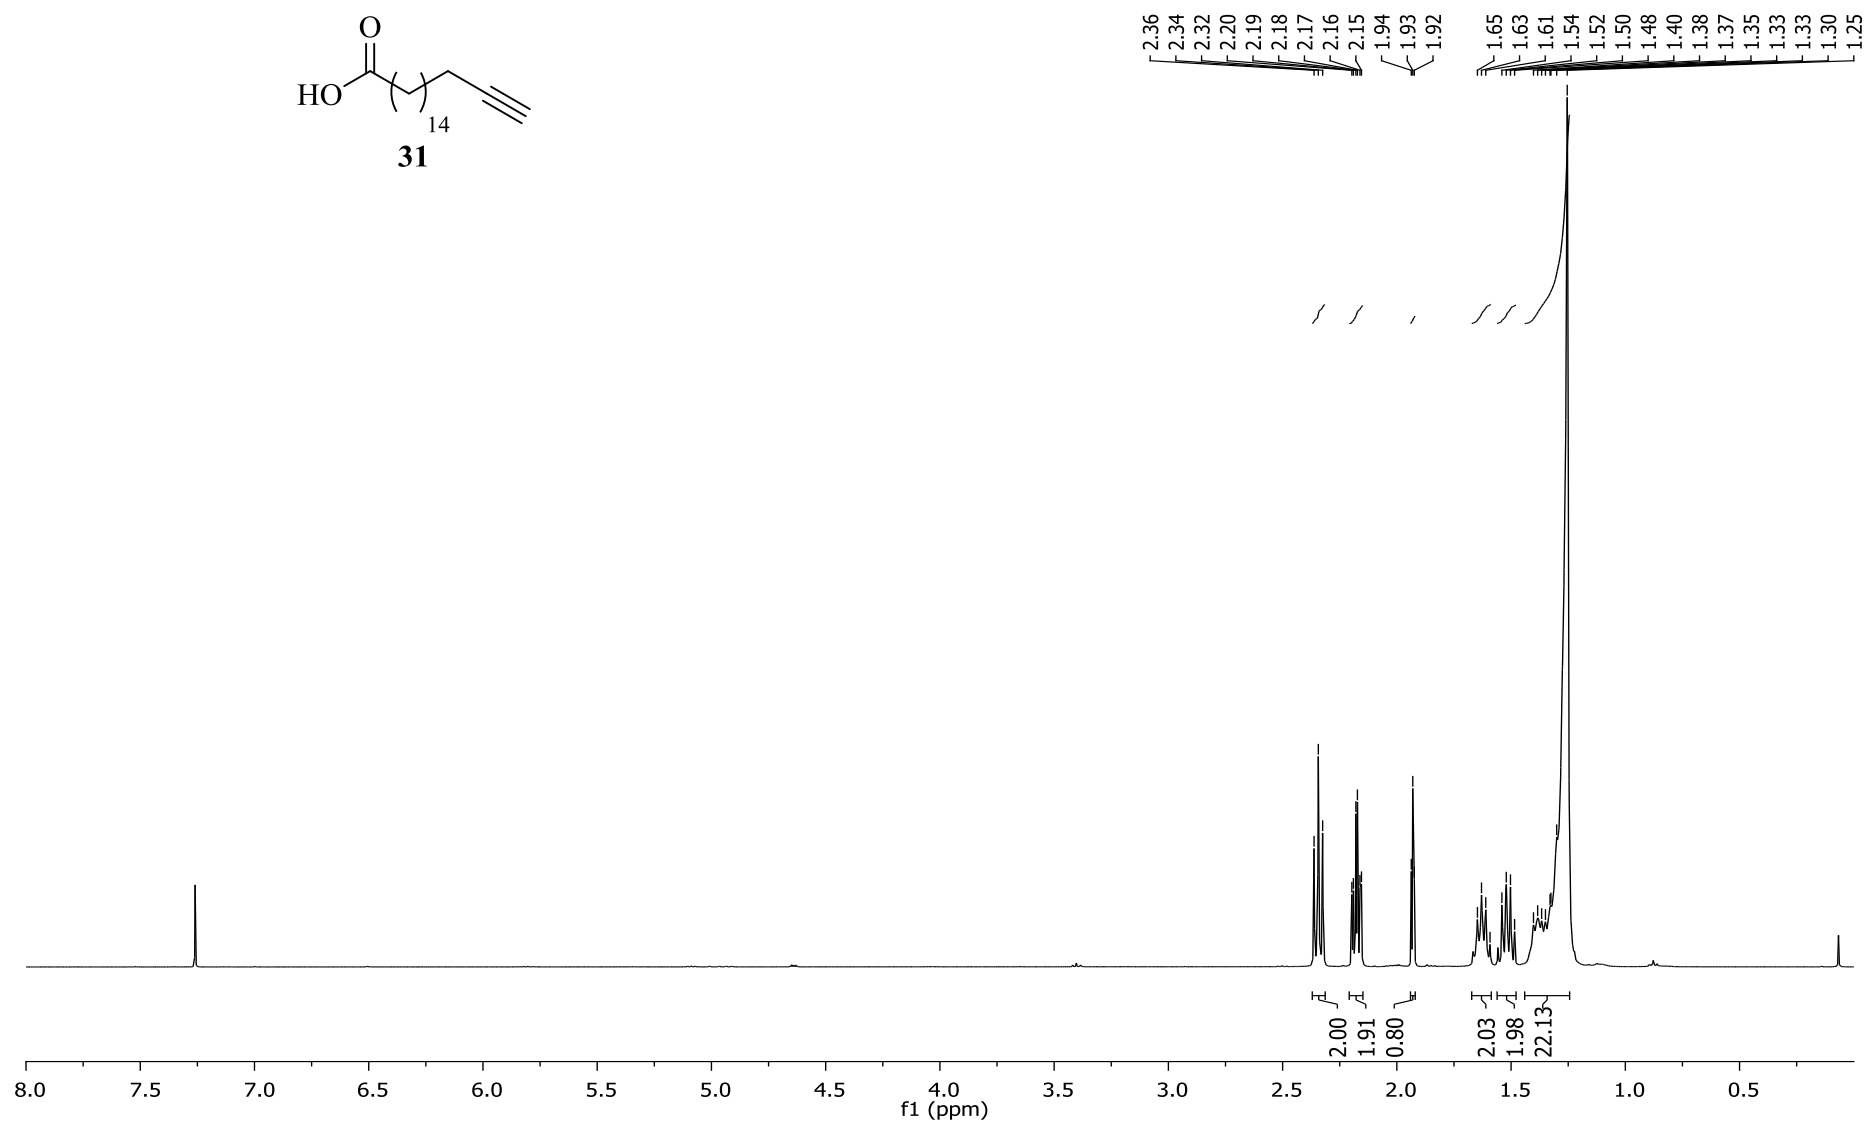



Octadec-17-ynoic acid **31**  $^{13}\text{C}$  NMR (101 MHz,  $\text{CDCl}_3$ )

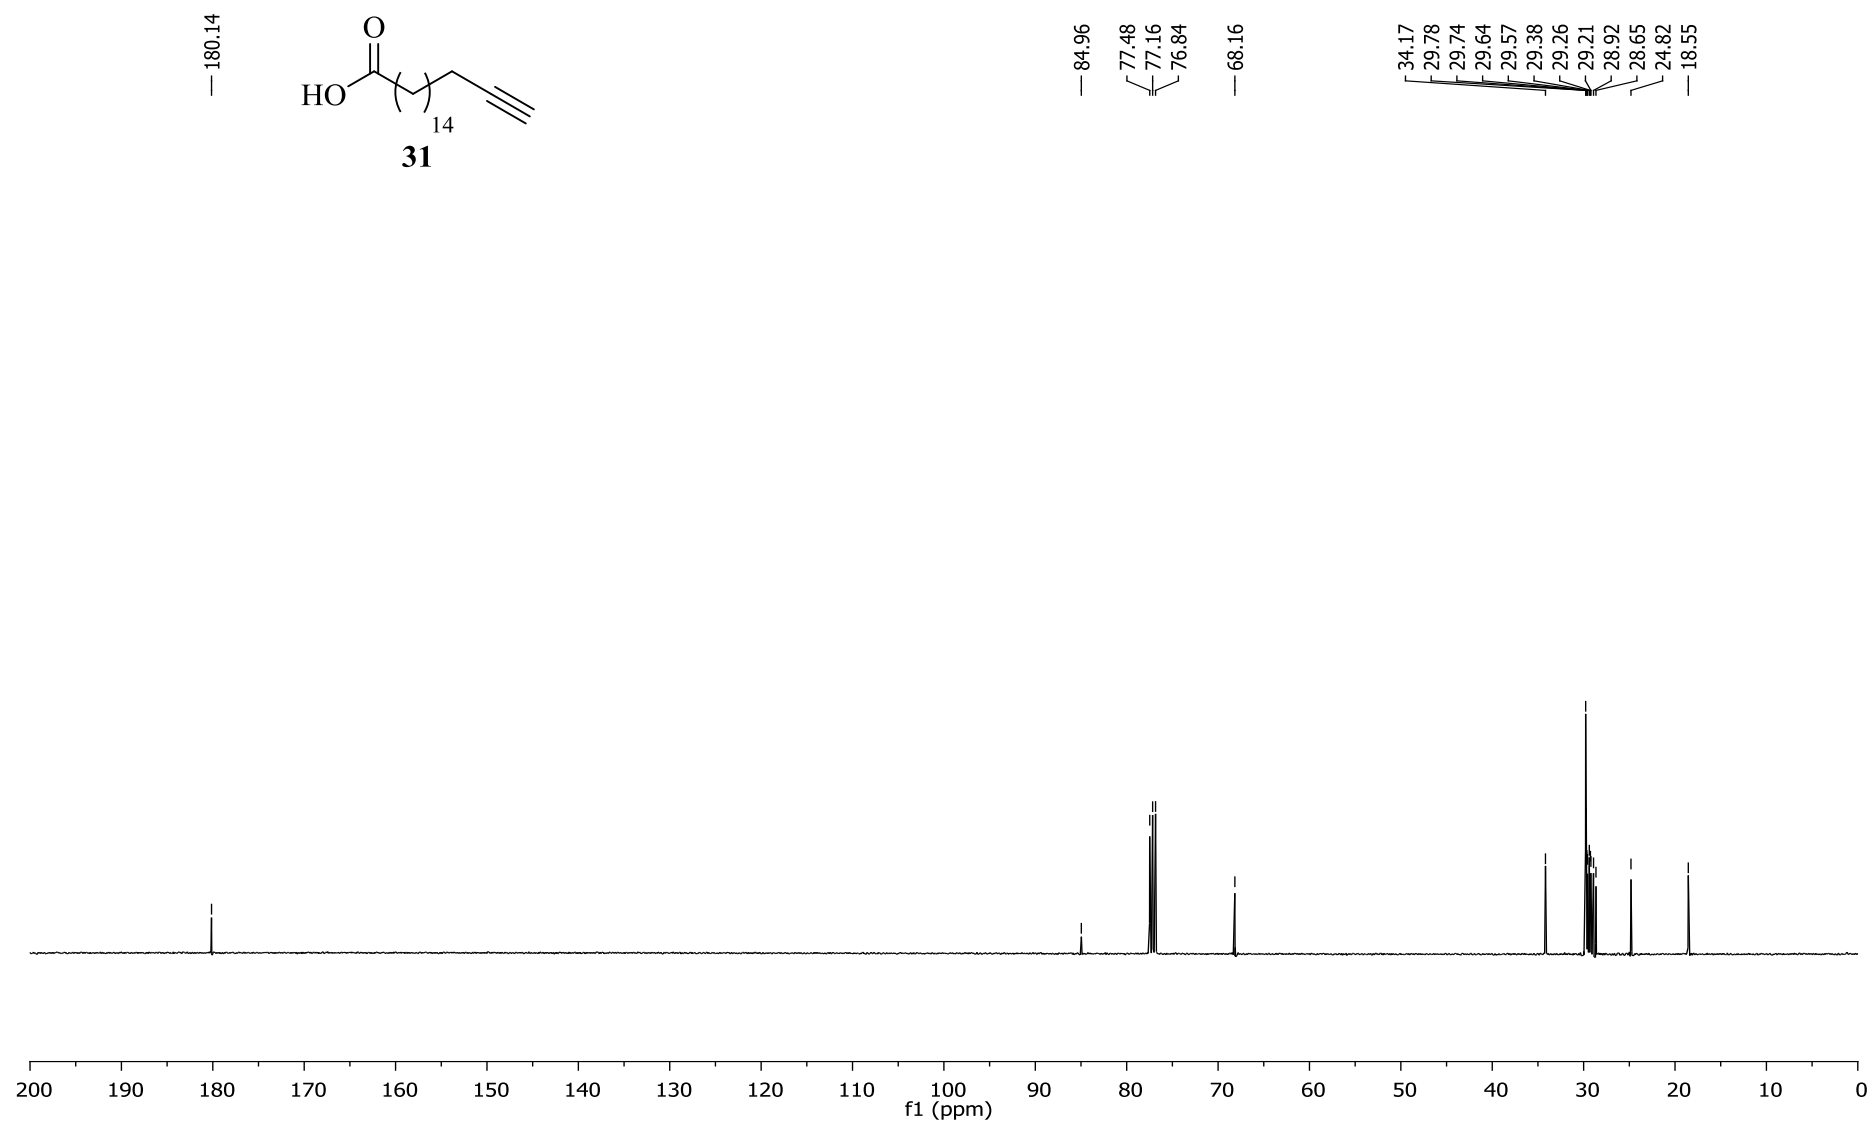

Icos-19-ynoic acid **32**  $^1\text{H}$  NMR (400 MHz,  $\text{CDCl}_3$ )

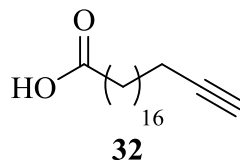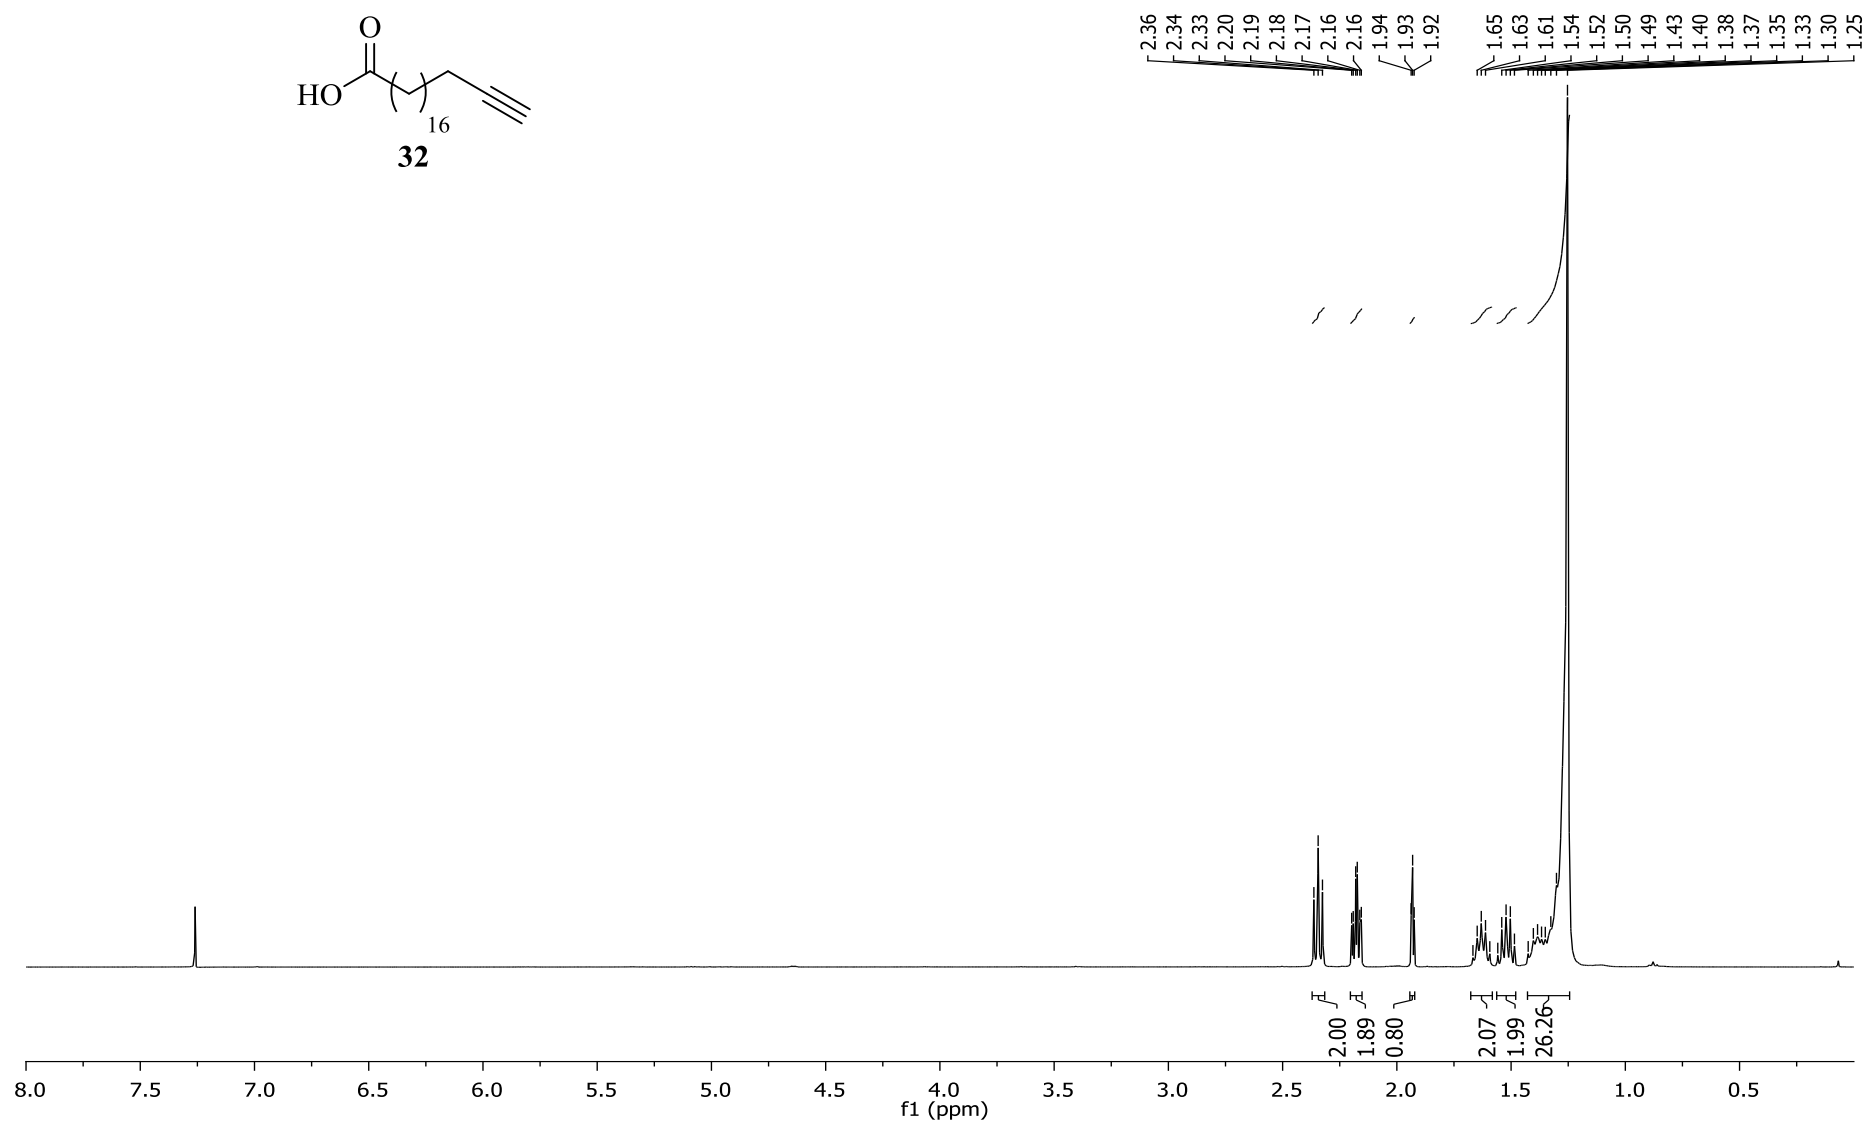

Icos-19-ynoic acid **32**  $^{13}\text{C}$  NMR (101 MHz,  $\text{CDCl}_3$ )

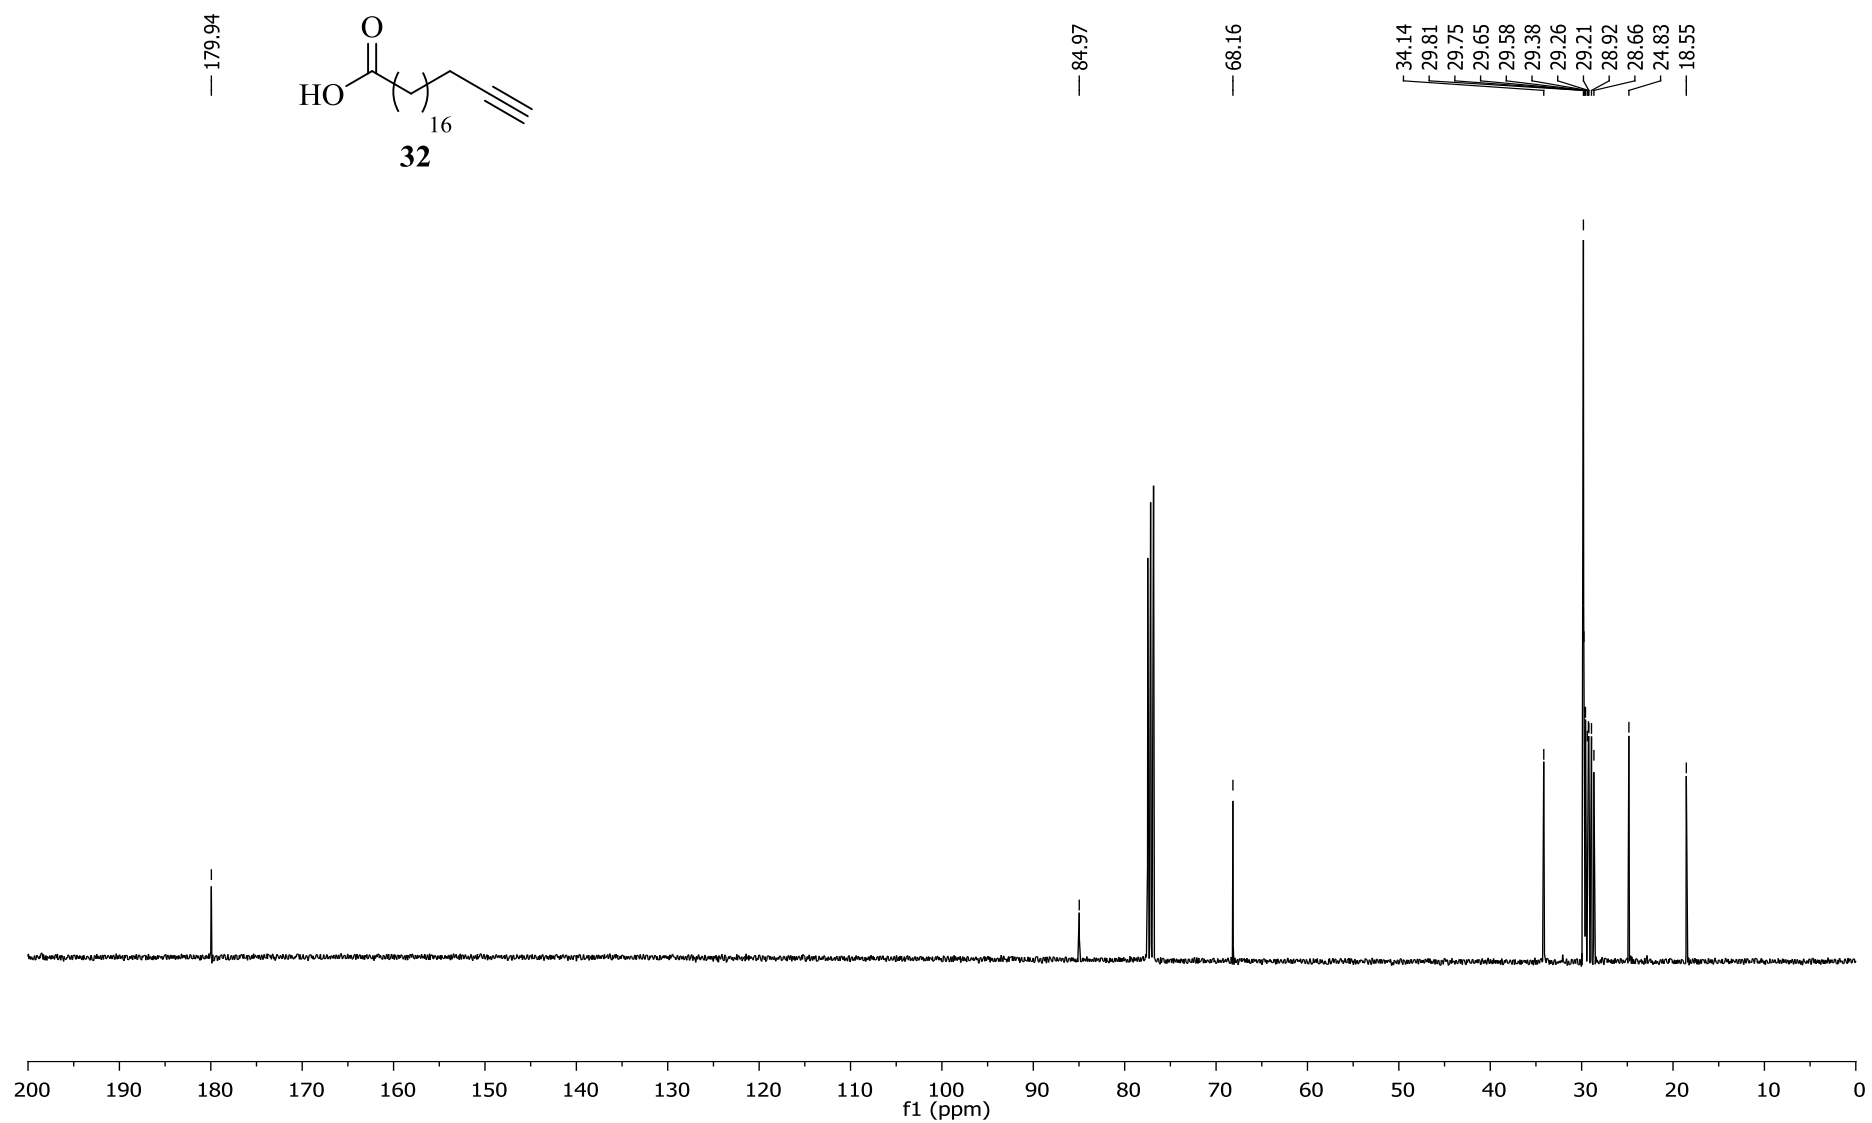

## References

1. Mori K (2008) Synthesis of all the six components of the female-produced contact sex pheromone of the German cockroach, *Blattella germanica* (L.). *Tetrahedron* **64**(18):4060-4071.
2. Zhang T, Zheng FP, Xu XH, Huang C, Liu YP, Sun BG (2014) Synthesis of Bromoalkanols under Microwave Irradiation. *Adv Mater Res* **1051**:182-185.
3. Dong C-Z, Ahamada-Himidi A, Plocki S, Aoun D, Touaibia M, Meddad-Bel Habich N, Huet J, Redeuilh C, Ombetta J-E, Godfroid J-J, Massicot F, Heymans F (2005) Inhibition of secretory phospholipase A2. 2-Synthesis and structure–activity relationship studies of 4,5-dihydro-3-(4-tetradecyloxybenzyl)-1,2,4-*H*-oxadiazol-5-one (PMS1062) derivatives specific for group II enzyme. *Bioorg Med Chem* **13**(6):1989-2007.
4. Davis SC, Sui Z, Peterson JA, de Montellano PRO (1996) Oxidation of  $\omega$ -Oxo Fatty Acids by Cytochrome P450BM-3(CYP102). *Arch Biochem Biophys* **328**(1):35-42.
5. Ames DE, Covell AN, Goodburn TG (1965) Syntheses of long-chain acids. Part VI. Acetylenic acids and *cis,cis*-docosa-5,13-dienoic acid. *J Chem Soc* (0):894-899.
6. Hang HC, Geutjes E-J, Grotenbreg G, Pollington AM, Bijlmakers MJ, Ploegh HL (2007) Chemical Probes for the Rapid Detection of Fatty-Acylated Proteins in Mammalian Cells. *J Am Chem Soc* **129**(10):2744-2745.
7. Charron G, Zhang MM, Yount JS, Wilson J, Raghavan AS, Shamir E, Hang HC (2009) Robust Fluorescent Detection of Protein Fatty-Acylation with Chemical Reporters. *J Am Chem Soc* **131**(13):4967-4975.
8. Hebert N, Beck A, Lennox RB, Just G (1992) A new reagent for the removal of the 4-methoxybenzyl ether: application to the synthesis of unusual macrocyclic and bolaform phosphatidylcholines. *J Org Chem* **57**(6):1777-1783.
9. Yuen AKL, Heinroth F, Ward AJ, Masters AF, Maschmeyer T (2012) Novel bis(methylimidazolium)alkane bolaamphiphiles as templates for supermicroporous and mesoporous silicas. *Microporous Mesoporous Mater* **148**(1):62-72.
10. Opálka L, Kováčik A, Sochorová M, Roh J, Kuneš J, Lenčo J, Vávrová K (2015) Scalable Synthesis of Human Ultralong Chain Ceramides. *Org Lett* **17**(21):5456-5459.
11. Hunsdiecker H, Hunsdiecker C (1942) Über den Abbau der Salze aliphatischer Säuren durch Brom. *Chem Ber* **75**(3):291-297.
12. DeVries VG, Moran DB, Allen GR, Riggi SJ (1976) Hypolipidemic alkoxybenzoic acids. *J Med Chem* **19**(7):946-957.
13. Holder SJ, Sriskantha BC, Bagshaw SA, Bruce IJ (2012) Headgroup effects on the krafft temperatures and self-assembly of  $\omega$ -hydroxy and  $\omega$ -carboxy hexadecyl quaternary ammonium bromide bolaform amphiphiles: Micelles versus molecular clusters? *J Colloid Interface Sci* **367**(1):293-304.
14. Augustin KE, Schäfer HJ (1991) Conversion of oleic acid to 17- and 18-substituted stearic acid derivatives by way of the "acetylene zipper". *Liebigs Ann Chem* (10):1037-1040.
15. Lucas T, Schäfer HJ (2014) Hydroboration of unsaturated fatty acid methyl esters and conversion of the boron adducts. *Eur J Lipid Sci Technol* **116**(1):52-62.
16. Cardinale G, Laan JAM, Van der Steen D, Ward JP (1985) Bifunctional compounds from reaction of alkoxy hydroperoxides with metal salts. *Tetrahedron* **41**(24):6051-6054.
17. Musgrave OC, Stark J, Spring FS (1952) Non-saponifiable constituents of Spanish broom. *J Chem Soc* (0):4393-4397.
18. Polyakova SM, Belov VN, Yan SF, Eggeling C, Ringemann C, Schwarzmann G, de Meijere A, Hell SW (2009) New GM1 Ganglioside Derivatives for Selective Single and Double Labelling of the Natural Glycosphingolipid Skeleton. *Eur J Org Chem* (30):5162-5177.
19. Chuit P, Hausser J (1929) Réduction des éthers diméthyliques des acides polyméthylène-dicarboniques de 15 à 21 atomes de carbone, par le sodium et l'alcool. *Helv Chim Acta* **12**(1):850-859.
20. Kimura K, Takahashi M, Tanaka A (1960) Anodic Synthesis of Fatty Acids. VI. The Syntheses of  $\omega$ -Hydroxylated Fatty Acids and  $\omega,\omega'$ -Diols. *Chem Pharm Bull* **8**(12):1059-1062.

21. Weber ME, Schlesinger PH, Gokel GW (2005) Dynamic Assessment of Bilayer Thickness by Varying Phospholipid and Hydraphile Synthetic Channel Chain Lengths. *J Am Chem Soc* **127**(2):636-642.
22. Van der Steen M, Stevens CV, Eeckhout Y, De Buyck L, Ghelfi F, Roncaglia F (2008) Undecylenic acid: A valuable renewable building block on route to Tyromycin A derivatives. *Eur J Lipid Sci Technol* **110**(9):846-852.
23. Drescher S, Meister A, Blume A, Karlsson G, Almgren M, Dobner B (2007) General Synthesis and Aggregation Behaviour of a Series of Single-Chain 1, $\omega$ -Bis(phosphocholines). *Chem Eur J* **13**(18):5300-5307.
24. Signer R , Sprecher P (1947) Die Synthese von  $\omega$ -Bromdokosanol. *Helv Chim Acta* **30**(4):1001-1004.

| Acyl-CoA    | MRM Transition | Collision Energy (eV) | Declustering Potential (eV) | Dwell Time (ms) | Response factor |
|-------------|----------------|-----------------------|-----------------------------|-----------------|-----------------|
| 14:0        | 976→471        | 40                    | 40                          | 500             | 2.25            |
| 16:0        | 1006→499       | 40                    | 40                          | 500             | 2.38            |
| 16:1        | 1004→497       | 40                    | 40                          | 500             | 2.3             |
| 17:0        | 1020→513       | 40                    | 40                          | 100             | 2.32            |
| 18:0        | 1034→527       | 45                    | 40                          | 250             | 2.62            |
| 18:1        | 1032→525       | 45                    | 40                          | 250             | 2.5             |
| 18:2        | 1030→523       | 50                    | 45                          | 500             | 2.4             |
| 20:0        | 1062→555       | 50                    | 45                          | 500             | 2.48            |
| 20:2        | 1058→551       | 50                    | 45                          | 500             | 2.3             |
| 20:4        | 1054→547       | 50                    | 45                          | 250             | 2.23            |
| 20:5        | 1052→545       | 55                    | 45                          | 500             | 2.2             |
| 22:0        | 1090→583       | 50                    | 45                          | 500             | 2.2             |
| 22:4        | 1082→575       | 55                    | 45                          | 500             | 2.1             |
| 22:5        | 1080→573       | 55                    | 45                          | 500             | 2.1             |
| 22:6        | 1078→571       | 50                    | 45                          | 500             | 2.1             |
| C14:0-azide | 1019→512       | 40                    | 40                          | 500             | 2.3             |
| C16:0-azide | 1047→540       | 40                    | 40                          | 500             | 2.3             |
| C16:1-azide | 1045→538       | 40                    | 40                          | 500             | 2.3             |
| C18:0-azide | 1075→568       | 45                    | 40                          | 500             | 2.3             |
| C18:1-azide | 1073→566       | 45                    | 40                          | 500             | 2.2             |
| C18:2-azide | 1071→564       | 45                    | 40                          | 500             | 2.1             |
| C20:0-azide | 1113→596       | 50                    | 45                          | 500             | 2.3             |
| C20:1-azide | 1111→594       | 50                    | 45                          | 500             | 2.3             |
| C22:0-azide | 1141→624       | 50                    | 45                          | 500             | 2.2             |

**Table 1. MRM Transitions:**

Multiple reaction monitoring transitions were based upon optimized fragmentation in positive ion mode. Interface temp 30 C, Nanomate: gas pressure 0.5 psi, Tip voltage 1.25-1.3kV, EP 8, CXP 12.

<sup>1</sup> Resp Factor<sup>1</sup> (10<sup>6</sup> cpm/pmole) are based upon standard curve point (1000, 500, 100, 10, 5, 2.5 and 1 pmole(s)) has its own response in terms of number of specific ions observed by the mass spectrometer under those specific conditions. Values in blue represent estimates in the absence of actual standards and similar related response factors observed previously (doi: 10.1194/jlr.D800001-JLR200))

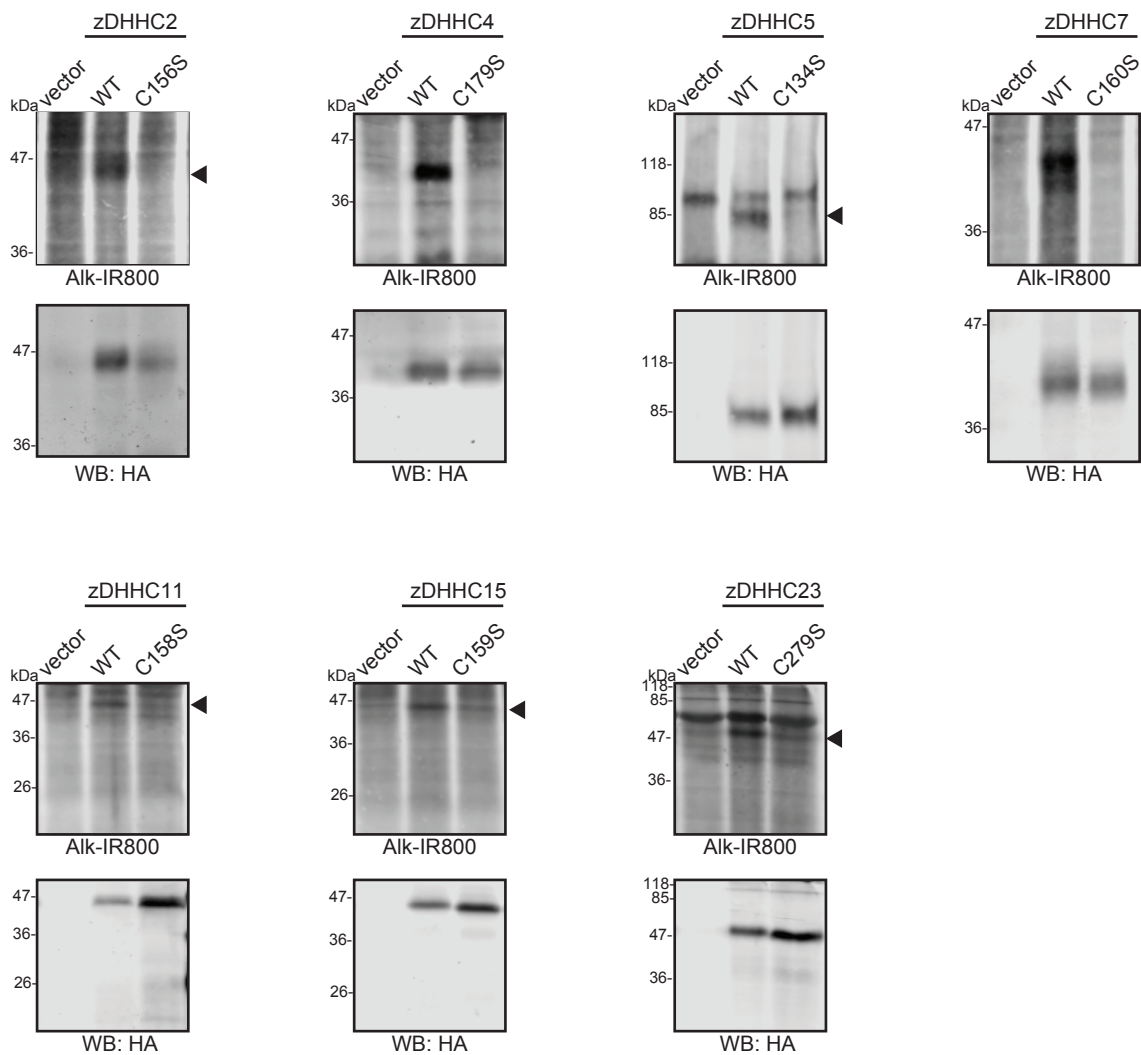

**Supplementary Figure 1: S-acylation of wild-type and inactive zDHHC enzymes by C16:0- azides.**

HEK293T cells transfected with HA-tagged wild-type or mutant zDHHC enzyme constructs containing a cysteine-to-serine mutation of the catalytic DHC cysteine residue. Cells were then incubated with C16:0 fatty acid azides for 4 h at 37 °C. Fatty acid azides were then labelled by click chemistry using an alkyne-800 infrared dye. Isolated proteins were resolved by SDS-PAGE and transferred to nitrocellulose membranes. Representative click signals and western blots are shown. Position of molecular weight markers are shown on the left. Arrowheads indicate the zDHHC bands that incorporate label.





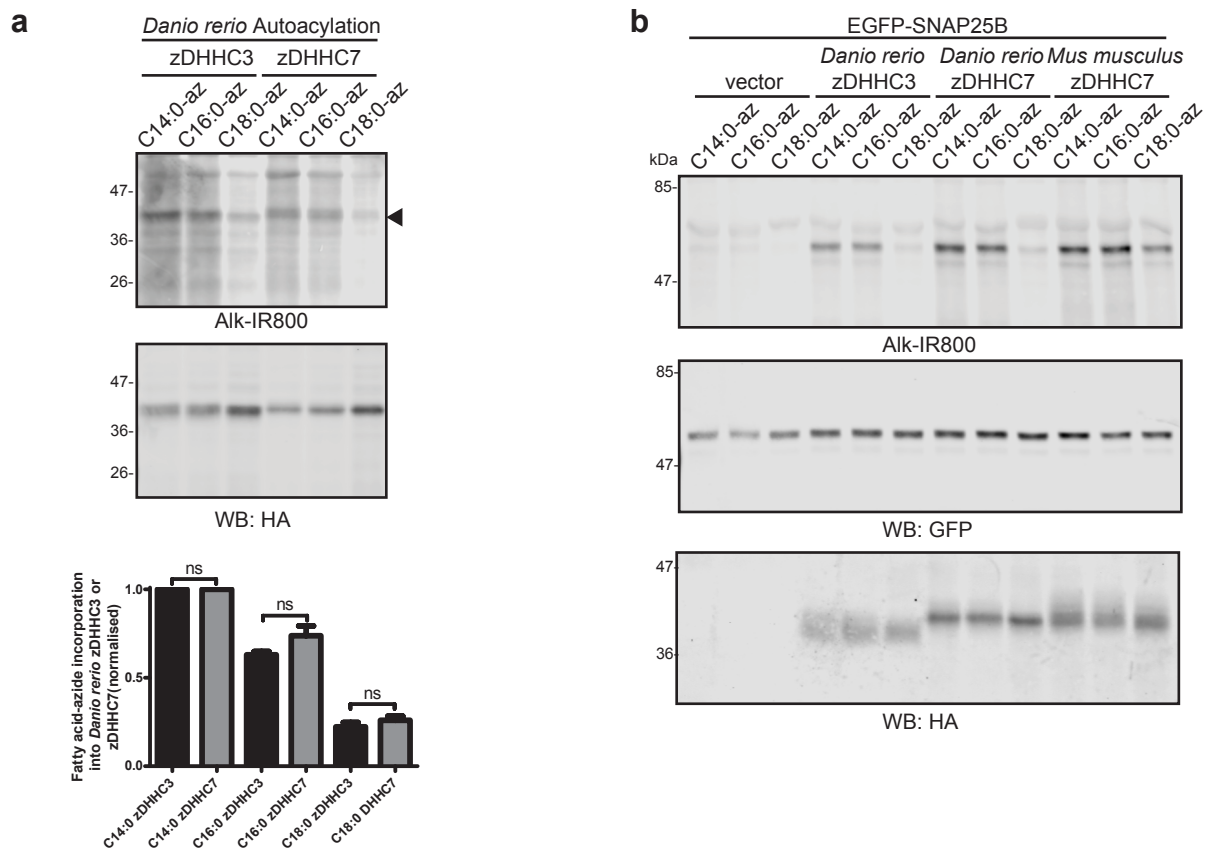

**Supplementary Figure 3: S-acylation profiles of *Danio rerio* zDHHC3 and zDHHC7 by fatty-acid azides.**

(A) HEK293T cells transfected with HA-tagged zDHHC3 or zDHHC7 from *Danio rerio* were incubated with C14:0, C16:0 or C18:0 fatty acid azides for 4 h at 37 °C. Fatty acid azides were then labelled by click chemistry using an alkyne-800 infrared dye. Isolated proteins were resolved by SDS-PAGE and transferred to nitrocellulose membranes. Representative click signals and western blots and quantified data (mean ± SEM) are shown. n = 5; ns = not significant. (B) HEK293T cells were transfected with EGFP-SNAP25B together with either pEF-BOS-HA (vector control), zDHHC3 or zDHHC7 from *Danio rerio*, or mouse zDHHC7. Cells were then incubated with C14:0, C16:0 or C18:0 fatty acid azides for 4 h at 37 °C, and fatty acid azides were then labelled by click chemistry using an alkyne-800 infrared dye. Isolated proteins were resolved by SDS-PAGE and transferred to nitrocellulose membranes. Representative click signals and western blots are shown.
